# Supplementary material for: Linking Alpine deformation in the Aar Massif basement and its cover units – the case of the Jungfrau-Eiger Mountains (Central Alps, Switzerland)
Source: Copernicus journal article supplement (doi:10.5194/se-2018-49), 2018-06-05
Supplement: Supplementary file 1 [file Fitted_planes.xls]

## Sheet: SZ1
x_median	y_median	z_median	length	azimuth	dip	M	K
644286	154851	3831	80	169	66	5.5	0.1
644248	155202	3836	133	184	68	5.7	0.12
644340	154769	3843	53	167	62	5.9	0.13
644040	155774	3748	171	148	81	8.1	0.15
644384	154667	3788	192	187	54	7.9	0.16
644319	154313	3639	44	197	53	6	0.16
644316	154806	3830	108	156	53	6.3	0.2
644275	154923	3853	96	188	40	6	0.2
644335	154419	3688	102	181	50	5.8	0.22
644279	154885	3862	52	179	72	5.3	0.23
644268	155139	3877	92	193	54	6.7	0.26
644323	154743	3802	105	345	86	6.8	0.27
644311	154301	3638	35	231	53	5.7	0.34
644142	155417	3836	75	143	70	6.6	0.35
644045	155872	3739	165	160	81	6.4	0.35
643862	155954	3733	84	146	79	8.1	0.35
644185	155377	3851	74	186	55	6.5	0.36
644022	155907	3755	124	146	81	7.4	0.37
644312	154303	3634	35	207	61	5.5	0.38
644372	154609	3780	209	177	48	6.8	0.44
644229	155115	3850	127	200	61	6.3	0.47
644297	154763	3802	118	156	65	6.6	0.5
644321	154379	3665	78	179	53	6.6	0.52
644276	154260	3639	29	350	66	6	0.52
644306	154868	3849	63	171	64	6	0.57
644069	155499	3808	121	196	51	7.2	0.57
644252	154929	3868	45	162	57	6.3	0.58
643863	154279	3379	27	160	85	8.3	0.61
644191	155148	3815	183	192	64	6.6	0.62
643888	155889	3736	127	139	63	6.5	0.65
644329	154457	3712	122	194	47	7.4	0.67
644298	154316	3632	75	184	49	6.8	0.68
644248	155054	3874	31	233	46	9.6	0.93
644276	154803	3839	83	133	63	7	0.99
643991	155222	3611	24	153	79	9.4	1
643988	155597	3723	91	261	56	7.4	1.1
643837	154699	3486	31	207	73	7.6	1.3
644097	154968	3696	155	257	46	8.9	1.3
644359	154634	3798	152	350	54	4.7	1.4
644108	155316	3757	39	252	53	8	1.6
644108	155316	3757	39	252	53	8	1.6
643829	154404	3403	36	192	71	5	1.7
643829	154404	3403	36	192	71	5	1.7
644020	155066	3593	72	266	48	7.4	1.7
643925	154613	3495	169	237	41	9.1	1.7
644116	154915	3752	22	232	54	7.2	1.7
644220	154951	3847	45	250	48	7.2	1.8
643922	155353	3587	67	249	52	6.4	1.8
644025	154785	3649	22	257	49	7.8	1.9
643984	155501	3699	111	261	50	7.5	1.9
644178	155002	3792	61	271	50	8.1	1.9
643992	155831	3798	65	202	68	5.9	1.9
644178	155002	3792	61	271	50	8.1	1.9
644025	154785	3649	22	257	49	7.8	1.9
643840	154737	3471	31	248	59	5.1	2
644023	155728	3795	35	154	72	10	2
644039	155029	3623	25	259	52	7.9	2.1
644039	155029	3623	25	259	52	7.9	2.1
644036	154762	3654	42	279	54	8.8	2.1
644054	155121	3636	48	264	46	7.7	2.3
643882	154435	3466	40	217	44	5.6	2.3
643882	154435	3466	40	217	44	5.6	2.3
644012	155593	3759	55	279	59	5.8	2.4
644152	155224	3761	182	227	48	7.9	2.4
643982	154960	3567	40	340	88	8.3	2.6
644226	154136	3589	24	200	47	4.3	2.7
644068	155462	3794	35	263	51	7.1	2.7
644068	155462	3794	35	263	51	7.1	2.7
643984	154938	3570	35	175	84	8.1	2.8
643952	155662	3688	56	249	47	7.1	2.9
644063	155411	3774	140	187	53	6.7	2.9
643818	154347	3377	39	177	77	6.8	3.2
643818	154347	3377	39	177	77	6.8	3.2
644077	154879	3706	75	308	77	6.6	3.2
644288	154582	3713	46	252	59	6.7	3.3
643861	154700	3511	55	175	89	5.2	3.8
644060	155262	3686	41	253	45	8.3	3.8
644043	154947	3636	27	264	45	8.5	4.3
643869	154491	3446	90	193	71	6.7	4.6
643980	154581	3609	37	303	87	7	4.8
644016	154897	3610	91	254	51	6.1	5.1
644032	155047	3622	52	181	72	6.6	6.2
643929	155759	3703	68	204	44	6.5	6.5
643940	155301	3596	33	289	67	6.9	6.6
643941	155687	3684	36	226	51	6.5	6.6
644053	155002	3630	81	342	80	6.5	7.1
643943	154844	3551	83	340	89	6.8	7.3
643960	155636	3689	76	297	88	6	8
643988	155296	3643	55	212	53	7	10
644335	155390	3759	203	33	74	7.9	10
644335	155390	3759	203	33	74	7.9	10
643991	154897	3586	102	269	46	7.6	17
643803	154259	3336	39	156	76	4	36
643803	154259	3336	39	156	76	4	36

## Sheet: SZ2
x_median	y_median	z_median	length	azimuth	dip	M	K
644047	155662	3805	107	195	24	5.7	0.066
643899	155958	3740	169	119	13	6	0.079
643887	155967	3715	203	134	15	5.2	0.15
643920	155946	3758	129	123	34	4.1	0.15
643964	155825	3744	365	147	21	6.9	0.45
644307	154768	3807	421	204	21	4.6	0.71
644101	155500	3831	157	131	13	5	1.4
643948	154588	3537	112	283	81	7.5	1.6
644048	155626	3787	184	199	13	6.4	1.6
643985	155005	3561	435	155	29	6.8	1.7
643831	155876	3688	99	245	86	9	1.9
644272	155636	3636	239	172	25	5.9	2.3
644272	155636	3636	239	172	25	5.9	2.3
643934	155693	3684	130	247	46	8.3	2.6
643981	154806	3605	94	245	16	6.3	2.6
644073	155023	3658	147	284	70	7.1	2.9
643994	155555	3734	476	165	13	6.5	4.3
644105	154924	3737	129	119	82	6.9	4.6
644133	155256	3772	102	254	60	5.4	4.7
643940	155707	3691	95	251	56	7.8	8.1
