# Supplementary material for: Linking Alpine deformation in the Aar Massif basement and its cover units – the case of the Jungfrau-Eiger Mountains (Central Alps, Switzerland)
Source: Copernicus journal article supplement (doi:10.5194/se-2018-49), 2018-06-05
Supplement: Supplementary file 2 [file Used_spectra.xlsx]

## Sheet: quality_assessment
sample	sample_name	T_poly3_def	quality	mode	uncertainty	T_poly3_minphases	quality	mode	uncertainty	T_final_selection	quality_fit	readout_opts
fit_AM01-1-01	AM-01	329	B	poly3_def	36	334	C	poly3_min_phases	36	329	B	poly3_def
fit_AM01-1-02	AM-01	320	B	poly3_def	36	324	C	poly3_min_phases	36	320	B	poly3_def	36
fit_AM01-1-03	AM-01	322	U	poly3_def	36	324	U	poly3_min_phases	36	292	A	poly3_min_phases
fit_AM01-1-04	AM-01	316	U	poly3_def	36	317	U	poly3_min_phases	36
fit_AM01-1-05	AM-01	299	U	poly3_def	36	308	U	poly3_min_phases	36
fit_AM01-1-06	AM-01	281	B	poly3_def	36	292	A	poly3_min_phases	36	292	A	poly3_min_phases
fit_AM01-1-07	AM-01	301	C	poly3_def	36	324	U	poly3_min_phases	36
fit_AM01-1-08-short	AM-01	370	U	poly3_def	36	378	U	poly3_min_phases	36
fit_AM01-1-09	AM-01	327	A	poly3_def	36	340	B	poly3_min_phases	36	327	A	poly3_def
fit_AM01-1-10	AM-01	300	B	poly3_def	36	323	B	poly3_min_phases	36	323	B	poly3_min_phases
fit_AM01-1-11	AM-01	279	B	poly3_def	36	295	B	poly3_min_phases	36	295	B	poly3_min_phases
fit_AM01-1-12	AM-01	279	B	poly3_def	36	301	B	poly3_min_phases	36	301	B	poly3_min_phases
fit_AM01-1-13	AM-01	297	U	poly3_def	36	323	U	poly3_min_phases	36
fit_AM01-1-14	AM-01	263	U	poly3_def	36	282	U	poly3_min_phases	36
fit_AM01-1-15	AM-01	199	U	poly3_def	37	246	U	poly3_min_phases	36
fit_AM01-1-16	AM-01	285	C	poly3_def	36	296	C	poly3_min_phases	36
fit_AM01-1-17	AM-01	270	B	poly3_def	36	288	B	poly3_min_phases	36	288	B	poly3_min_phases
fit_AM01-1-18	AM-01	267	B	poly3_def	36	288	B	poly3_min_phases	36	288	B	poly3_min_phases
fit_AM01-1-19	AM-01	275	B	poly3_def	36	290	B	poly3_min_phases	36	290	B	poly3_min_phases
fit_AM01-1-20	AM-01	267	B	poly3_def	36	289	B	poly3_min_phases	36	289	B	poly3_min_phases
fit_AM01-1-21	AM-01	321	A	poly3_def	36	333	A	poly3_min_phases	36	333	A	poly3_min_phases
fit_AM01-1-22	AM-01	313	B	poly3_def	36	335	B	poly3_min_phases	36	335	B	poly3_min_phases
fit_EG1701-01-badquality	EG-17-01	322	C	poly3_def	36	355	C	poly3_min_phases	36
fit_EG1701-02	EG-17-01	293	B	poly3_def	36	301	B	poly3_min_phases	36	293	B	poly3_def
fit_EG1701-03	EG-17-01	289	B	poly3_def	36	293	A	poly3_min_phases	36	293	A	poly3_min_phases
fit_EG1701-04	EG-17-01	275	C	poly3_def	36	289	B	poly3_min_phases	36	289	B	poly3_min_phases
fit_EG1701-05	EG-17-01	284	B	poly3_def	36	297	B	poly3_min_phases	36	284	B	poly3_def
fit_EG1701-06-badquality	EG-17-01	289	U	poly3_def	36	307	U	poly3_min_phases	36
fit_EG1701-07-badquality	EG-17-01	306	U	poly3_def	36	325	U	poly3_min_phases	36
fit_EG1701-08-badquality	EG-17-01	265	C	poly3_def	36	285	B	poly3_min_phases	36	285	B	poly3_min_phases
fit_EG1701-09-badquality	EG-17-01	298	U	poly3_def	36	305	U	poly3_min_phases	36
fit_EG1701-10	EG-17-01	297	U	poly3_def	36	299	U	poly3_min_phases	36
fit_EG1701-11	EG-17-01	254	C	poly3_def	36	273	B	poly3_min_phases	36	273	B	poly3_min_phases
fit_EG1701-12	EG-17-01	286	U	poly3_def	36	291	U	poly3_min_phases	36
fit_EG1701-13-badquality	EG-17-01	206	U	poly3_def	37	239	U	poly3_min_phases	37
fit_EG1701-14	EG-17-01	280	B	poly3_def	36	292	B	poly3_min_phases	36	292	B	poly3_min_phases
fit_EG1701-15	EG-17-01	271	B	poly3_def	36	282	C	poly3_min_phases	36	271	B	poly3_def
fit_EG1701-16	EG-17-01	270	B	poly3_def	36	280	B	poly3_min_phases	36	280	B	poly3_min_phases
fit_EG1701-17	EG-17-01	256	B	poly3_def	36	281	B	poly3_min_phases	36	281	B	poly3_min_phases
fit_EG1701-18	EG-17-01	239	B	poly3_def	37	248	B	poly3_min_phases	36	248	B	poly3_min_phases
fit_EG1701-19	EG-17-01	290	U	poly3_def	36	300	U	poly3_min_phases	36
fit_EG1701-20	EG-17-01	229	U	poly3_def	37	261	U	poly3_min_phases	36
fit_EG1701-21	EG-17-01	267	C	poly3_def	36	273	B	poly3_min_phases	36	273	B	poly3_min_phases
fit_EG1701-22	EG-17-01	274	B	poly3_def	36	285	A	poly3_min_phases	36	285	A	poly3_min_phases
fit_EG1701-23	EG-17-01	282	B	poly3_def	36	293	B	poly3_min_phases	36	293	B	poly3_min_phases
fit_EG1701-24	EG-17-01	252	C	poly3_def	36	276	U	poly3_min_phases	36
fit_EG1701-25	EG-17-01	257	B	poly3_def	36	269	B	poly3_min_phases	36	269	B	poly3_min_phases
fit_EG1701-26	EG-17-01	255	B	poly3_def	36	270	B	poly3_min_phases	36	270	B	poly3_min_phases
fit_EG1701-27	EG-17-01	226	B	poly3_def	37	250	B	poly3_min_phases	36	250	B	poly3_min_phases
fit_EG1701-28	EG-17-01	293	B	poly3_def	36	306	B	poly3_min_phases	36	306	B	poly3_min_phases
fit_EG1701-29	EG-17-01	296	B	poly3_def	36	308	B	poly3_min_phases	36	308	B	poly3_min_phases
fit_EG1701-30	EG-17-01	276	A	poly3_def	36	283	A	poly3_min_phases	36	283	A	poly3_min_phases
fit_EG1701-31	EG-17-01	295	A	poly3_def	36	303	A	poly3_min_phases	36	303	A	poly3_min_phases
fit_EG1701-32	EG-17-01	316	U	poly3_def	36	321	U	poly3_min_phases	36
fit_EG1701-33	EG-17-01	287	B	poly3_def	36	294	B	poly3_min_phases	36	294	B	poly3_min_phases
fit_EG1701-34	EG-17-01	293	B	poly3_def	36	304	B	poly3_min_phases	36	304	B	poly3_min_phases
fit_EG1701-35	EG-17-01	290	B	poly3_def	36	299	B	poly3_min_phases	36	290	B	poly3_def
fit_EG1701-36	EG-17-01	303	U	poly3_def	36	312	U	poly3_min_phases	36
fit_EG1701-37	EG-17-01	282	A	poly3_def	36	289	A	poly3_min_phases	36	289	A	poly3_min_phases
fit_EG1701-38	EG-17-01	290	B	poly3_def	36	306	B	poly3_min_phases	36	306	B	poly3_min_phases
fit_EG1701-39	EG-17-01	257	A	poly3_def	36	267	A	poly3_min_phases	36	267	A	poly3_min_phases
fit_EN01-01	EN-01	254	U	poly3_def	36	274	U	poly3_min_phases	36
fit_EN01-02	EN-01	153	U	poly3_def	38	227	U	poly3_min_phases	37
fit_EN01-03	EN-01	223	U	poly3_def	37	251	U	poly3_min_phases	36
fit_EN01-04	EN-01	220	B	poly3_def	37	260	B	poly3_min_phases	36	260	B	poly3_min_phases
fit_EN01-05	EN-01	232	B	poly3_def	37	254	B	poly3_min_phases	36	254	B	poly3_min_phases
fit_EN01-06	EN-01	284	B	poly3_def	36	307	B	poly3_min_phases	36	307	B	poly3_min_phases
fit_EN01-07-goodquality	EN-01	280	A	poly3_def	36	286	A	poly3_min_phases	36	286	A	poly3_min_phases
fit_EN01-08-goodquality	EN-01	277	A	poly3_def	36	285	A	poly3_min_phases	36	285	A	poly3_min_phases
fit_EN01-09-goodquality	EN-01	266	A	poly3_def	36	272	A	poly3_min_phases	36	272	A	poly3_min_phases
fit_EN01-10-goodquality	EN-01	281	B	poly3_def	36	286	B	poly3_min_phases	36	286	B	poly3_min_phases
fit_EN01-11-goodquality	EN-01	274	B	poly3_def	36	285	B	poly3_min_phases	36	285	B	poly3_min_phases
fit_EN01-12-goodquality	EN-01	279	A	poly3_def	36	287	A	poly3_min_phases	36	287	A	poly3_min_phases
fit_EN01-13-okquality	EN-01	271	B	poly3_def	36	290	B	poly3_min_phases	36	290	B	poly3_min_phases
fit_EN01-14-goodquality	EN-01	276	B	poly3_def	36	284	B	poly3_min_phases	36	284	B	poly3_min_phases
fit_EN01-15-goodquality	EN-01	278	A	poly3_def	36	286	A	poly3_min_phases	36	286	A	poly3_min_phases
fit_EN01-16-goodquality	EN-01	271	A	poly3_def	36	280	A	poly3_min_phases	36	280	A	poly3_min_phases
fit_EN01-17-goodquality	EN-01	279	A	poly3_def	36	287	A	poly3_min_phases	36	287	A	poly3_min_phases
fit_EN01-18-goodquality	EN-01	287	A	poly3_def	36	292	A	poly3_min_phases	36	292	A	poly3_min_phases
fit_EN01-19-goodquality	EN-01	277	A	poly3_def	36	287	A	poly3_min_phases	36	287	A	poly3_min_phases
fit_EN01-20-okquality	EN-01	259	B	poly3_def	36	277	B	poly3_min_phases	36	277	B	poly3_min_phases
fit_EN01-21-goodquality	EN-01	275	B	poly3_def	36	284	B	poly3_min_phases	36	284	B	poly3_min_phases
fit_GH01-01-badquality	GH-01	201	U	poly3_def	37	239	U	poly3_min_phases	37
fit_GH01-02-badquality	GH-01	278	U	poly3_def	36	282	U	poly3_min_phases	36
fit_GH01-03	GH-01	275	B	poly3_def	36	288	B	poly3_min_phases	36	288	B	poly3_min_phases
fit_GH01-04	GH-01	269	B	poly3_def	36	279	B	poly3_min_phases	36	279	B	poly3_min_phases
fit_GH01-05	GH-01	278	A	poly3_def	36	284	A	poly3_min_phases	36	284	A	poly3_min_phases
fit_GH01-06	GH-01	278	A	poly3_def	36	283	A	poly3_min_phases	36	283	A	poly3_min_phases
fit_GH01-07	GH-01	280	A	poly3_def	36	288	A	poly3_min_phases	36	288	A	poly3_min_phases
fit_GH01-08	GH-01	258	B	poly3_def	36	280	B	poly3_min_phases	36	280	B	poly3_min_phases
fit_GH01-09	GH-01	271	B	poly3_def	36	275	B	poly3_min_phases	36	275	B	poly3_min_phases
fit_GH01-10	GH-01	270	B	poly3_def	36	273	B	poly3_min_phases	36	273	B	poly3_min_phases
fit_GH01-11-lowT	GH-01	201	B	poly3_def	37	219	B	poly3_min_phases	37	201	B	poly3_def
fit_GH01-12-lowT	GH-01	225	B	poly3_def	37	242	B	poly3_min_phases	37	225	B	poly3_def
fit_GH01-13-lowT	GH-01	235	U	poly3_def	37	250	U	poly3_min_phases	36
fit_GH01-14-goodquality	GH-01	318	A	poly3_def	36	320	A	poly3_min_phases	36	318	A	poly3_def
fit_GH01-15-goodquality	GH-01	324	A	poly3_def	36	325	A	poly3_min_phases	36	324	A	poly3_def
fit_GH01-16-goodquality	GH-01	317	A	poly3_def	36	319	A	poly3_min_phases	36	317	A	poly3_def
fit_GH01-17-goodquality	GH-01	298	A	poly3_def	36	301	A	poly3_min_phases	36	298	A	poly3_def
fit_GH01-18-goodquality	GH-01	281	A	poly3_def	36	286	A	poly3_min_phases	36	281	A	poly3_def
fit_GH01-19-goodquality	GH-01	322	A	poly3_def	36	322	A	poly3_min_phases	36	322	A	poly3_def
fit_GH01-20-lowT	GH-01	288	U	poly3_def	36	288	U	poly3_min_phases	36
fit_GH01-21-goodquality	GH-01	284	A	poly3_def	36	288	A	poly3_min_phases	36	284	A	poly3_def
fit_GH01-22-goodquality	GH-01	301	B	poly3_def	36	302	B	poly3_min_phases	36	301	B	poly3_def
fit_GH01-23-goodquality	GH-01	295	A	poly3_def	36	296	A	poly3_min_phases	36	295	A	poly3_def
fit_GH01-24-goodquality	GH-01	315	A	poly3_def	36	316	A	poly3_min_phases	36	315	A	poly3_def
fit_GH01-25-goodquality	GH-01	300	A	poly3_def	36	303	A	poly3_min_phases	36	300	A	poly3_def
fit_GH01-26-goodquality	GH-01	306	A	poly3_def	36	309	A	poly3_min_phases	36	306	A	poly3_def
fit_GH01-26-lowT	GH-01	268	B	poly3_def	36	274	B	poly3_min_phases	36	268	B	poly3_def
fit_GH01-27-goodquality	GH-01	305	A	poly3_def	36	306	A	poly3_min_phases	36	305	A	poly3_def
fit_GH01-28	GH-01	300	B	poly3_def	36	304	B	poly3_min_phases	36	300	B	poly3_def
fit_GH01-29	GH-01	288	A	poly3_def	36	294	A	poly3_min_phases	36	294	A	poly3_min_phases
fit_GH01-30	GH-01	315	U	poly3_def	36	325	U	poly3_min_phases	36
fit_GH01-31	GH-01	317	U	poly3_def	36	328	U	poly3_min_phases	36
fit_GH01-32	GH-01	297	U	poly3_def	36	301	U	poly3_min_phases	36
fit_GH01-33	GH-01	266	U	poly3_def	36	281	U	poly3_min_phases	36
fit_JT15E-01	JT-15E	272	B	poly3_def	36	286	B	poly3_min_phases	36	272	B	poly3_def
fit_JT15E-02	JT-15E	271	B	poly3_def	36	279	B	poly3_min_phases	36	279	B	poly3_min_phases
fit_JT15E-03	JT-15E	261	B	poly3_def	36	278	B	poly3_min_phases	36	278	B	poly3_min_phases
fit_JT15E-04	JT-15E	286	B	poly3_def	36	291	B	poly3_min_phases	36	291	B	poly3_min_phases
fit_JT15E-05	JT-15E	287	A	poly3_def	36	295	A	poly3_min_phases	36	295	A	poly3_min_phases
fit_JT15E-06	JT-15E	310	U	poly3_def	36	315	U	poly3_min_phases	36
fit_JT15E-07	JT-15E	270	B	poly3_def	36	285	B	poly3_min_phases	36	285	B	poly3_min_phases
fit_JT15E-08	JT-15E	318	U	poly3_def	36	327	U	poly3_min_phases	36
fit_JT15E-09	JT-15E	309	B	poly3_def	36	316	B	poly3_min_phases	36	316	B	poly3_min_phases
fit_JT15E-10	JT-15E	304	A	poly3_def	36	311	A	poly3_min_phases	36	311	A	poly3_min_phases
fit_JT15E-11	JT-15E	292	A	poly3_def	36	299	A	poly3_min_phases	36	299	A	poly3_min_phases
fit_JT15E-12	JT-15E	267	A	poly3_def	36	273	A	poly3_min_phases	36	273	A	poly3_min_phases
fit_JT15E-13	JT-15E	280	B	poly3_def	36	291	B	poly3_min_phases	36	291	B	poly3_min_phases
fit_JT15E-14	JT-15E	287	B	poly3_def	36	293	B	poly3_min_phases	36	293	B	poly3_min_phases
fit_JT15E-15	JT-15E	286	B	poly3_def	36	293	B	poly3_min_phases	36	293	B	poly3_min_phases
fit_JT15E-16	JT-15E	249	B	poly3_def	36	265	B	poly3_min_phases	36	265	B	poly3_min_phases
fit_JT15E-17	JT-15E	262	B	poly3_def	36	278	B	poly3_min_phases	36	278	B	poly3_min_phases
fit_JT15E-18	JT-15E	271	B	poly3_def	36	288	B	poly3_min_phases	36	288	B	poly3_min_phases
fit_JT15E-19	JT-15E	307	U	poly3_def	36	314	U	poly3_min_phases	36
fit_JT15E-20	JT-15E	255	B	poly3_def	36	270	B	poly3_min_phases	36	270	B	poly3_min_phases
fit_LAU02-01	LAU-02	290	U	poly3_def	36	299	U	poly3_min_phases	36
fit_LAU02-02	LAU-02	278	A	poly3_def	36	284	A	poly3_min_phases	36	284	A	poly3_min_phases
fit_LAU02-03	LAU-02	276	B	poly3_def	36	284	B	poly3_min_phases	36	284	B	poly3_min_phases
fit_LAU02-04	LAU-02	272	B	poly3_def	36	284	B	poly3_min_phases	36	284	B	poly3_min_phases
fit_LAU02-05	LAU-02	266	B	poly3_def	36	275	B	poly3_min_phases	36	275	B	poly3_min_phases
fit_LAU02-06	LAU-02	299	A	poly3_def	36	302	A	poly3_min_phases	36	299	A	poly3_def
fit_LAU02-07	LAU-02	298	A	poly3_def	36	300	A	poly3_min_phases	36	298	A	poly3_def
fit_LAU02-08	LAU-02	288	U	poly3_def	36	300	U	poly3_min_phases	36
fit_LAU02-09	LAU-02	284	B	poly3_def	36	288	A	poly3_min_phases	36	288	A	poly3_min_phases
fit_LAU02-10	LAU-02	285	B	poly3_def	36	292	B	poly3_min_phases	36	292	B	poly3_min_phases
fit_LAU02-11	LAU-02	282	A	poly3_def	36	287	A	poly3_min_phases	36	287	A	poly3_min_phases
fit_LAU02-12	LAU-02	264	B	poly3_def	36	281	B	poly3_min_phases	36	281	B	poly3_min_phases
fit_LAU02-13	LAU-02	264	B	poly3_def	36	272	B	poly3_min_phases	36	264	B	poly3_def
fit_LAU02-14	LAU-02	271	B	poly3_def	36	284	B	poly3_min_phases	36	271	B	poly3_def
fit_LAU02-15	LAU-02	260	B	poly3_def	36	271	B	poly3_min_phases	36	271	B	poly3_min_phases
fit_LAU02-16	LAU-02	282	B	poly3_def	36	289	B	poly3_min_phases	36	282	B	poly3_def
fit_LAU02-17	LAU-02	272	A	poly3_def	36	274	A	poly3_min_phases	36	274	A	poly3_min_phases
fit_LAU02-18	LAU-02	277	B	poly3_def	36	292	B	poly3_min_phases	36	292	B	poly3_min_phases
fit_LAU02-19	LAU-02	288	B	poly3_def	36	305	B	poly3_min_phases	36	288	B	poly3_def
fit_LAU02-20	LAU-02	278	B	poly3_def	36	291	B	poly3_min_phases	36	278	B	poly3_def
fit_LAU02-21	LAU-02	278	B	poly3_def	36	287	B	poly3_min_phases	36	278	B	poly3_def
fit_LAU02-22	LAU-02	284	B	poly3_def	36	288	B	poly3_min_phases	36	288	B	poly3_min_phases
fit_LAU02-23	LAU-02	302	B	poly3_def	36	310	A	poly3_min_phases	36	310	A	poly3_min_phases
fit_LAU02-24	LAU-02	263	B	poly3_def	36	282	B	poly3_min_phases	36	263	B	poly3_def
fit_LAU02-25	LAU-02	279	B	poly3_def	36	288	B	poly3_min_phases	36	288	B	poly3_min_phases
fit_LAU02-26	LAU-02	269	A	poly3_def	36	276	A	poly3_min_phases	36	276	A	poly3_min_phases
fit_MJ06-01	MJ-06	384	U	poly3_def	36	392	U	poly3_min_phases	36
fit_MJ06-02	MJ-06	347	U	poly3_def	36	352	U	poly3_min_phases	36
fit_MJ06-03	MJ-06	341	U	poly3_def	36	347	U	poly3_min_phases	36
fit_MJ06-04	MJ-06	355	U	poly3_def	36	359	U	poly3_min_phases	36
fit_MJ06-05	MJ-06	337	U	poly3_def	36	358	U	poly3_min_phases	36
fit_MJ06-06	MJ-06	307	U	poly3_def	36	307	U	poly3_min_phases	36
fit_MJ06-07	MJ-06	362	U	poly3_def	36	362	U	poly3_min_phases	36
fit_MJ06-08	MJ-06	351	U	poly3_def	36	373	U	poly3_min_phases	36
fit_MJ06-09	MJ-06	359	U	poly3_def	36	381	U	poly3_min_phases	36
fit_MJ06-10	MJ-06	249	U	poly3_def	36	269	U	poly3_min_phases	36
fit_MJ06-11-goodquality	MJ-06	313	A	poly3_def	36	320	A	poly3_min_phases	36	313	A	poly3_def
fit_MJ06-12-goodquality	MJ-06	321	B	poly3_def	36	326	B	poly3_min_phases	36	321	B	poly3_def
fit_MJ06-13-goodquality	MJ-06	334	B	poly3_def	36	338	B	poly3_min_phases	36	334	B	poly3_def
fit_MJ06-14-goodquality	MJ-06	308	B	poly3_def	36	321	B	poly3_min_phases	36	321	B	poly3_min_phases
fit_MJ06-14-okquality	MJ-06	312	U	poly3_def	36	316	U	poly3_min_phases	36
fit_MJ06-15-goodquality	MJ-06	323	A	poly3_def	36	331	B	poly3_min_phases	36	323	A	poly3_def
fit_MJ06-16-goodquality	MJ-06	317	A	poly3_def	36	322	A	poly3_min_phases	36	317	A	poly3_def
fit_MJ06-17	MJ-06	335	B	poly3_def	36	349	U	poly3_min_phases	36	335	B	poly3_def
fit_MJ06-18-goodquality	MJ-06	305	B	poly3_def	36	306	B	poly3_min_phases	36	306	B	poly3_min_phases
fit_MJ06-19	MJ-06	315	B	poly3_def	36	321	B	poly3_min_phases	36	321	B	poly3_min_phases
fit_MJ06-20-goodquality	MJ-06	318	A	poly3_def	36	319	A	poly3_min_phases	36	319	A	poly3_min_phases
fit_MJ06-21-goodquality	MJ-06	331	U	poly3_def	36	335	U	poly3_min_phases	36
fit_MJ06-22-okquality	MJ-06	318	B	poly3_def	36	328	B	poly3_min_phases	36	318	B	poly3_def
fit_MJ06-23-okquality	MJ-06	331	B	poly3_def	36	345	B	poly3_min_phases	36	331	B	poly3_def
fit_MJ06-24-okquality	MJ-06	324	U	poly3_def	36	329	U	poly3_min_phases	36
fit_MJ06-25-okquality	MJ-06	295	B	poly3_def	36	310	B	poly3_min_phases	36	310	B	poly3_min_phases
fit_MJ06-26	MJ-06	295	B	poly3_def	36	309	B	poly3_min_phases	36	295	B	poly3_def
fit_MJ06-27	MJ-06	301	B	poly3_def	36	310	B	poly3_min_phases	36	301	B	poly3_def
fit_MJ06-28	MJ-06	308	B	poly3_def	36	324	B	poly3_min_phases	36	308	B	poly3_def
fit_MJ06-29	MJ-06	320	A	poly3_def	36	326	A	poly3_min_phases	36	320	A	poly3_def
fit_MJ06-30	MJ-06	304	A	poly3_def	36	311	A	poly3_min_phases	36	304	A	poly3_def
fit_MS01-01-badquality	MJ-01	297	U	poly3_def	36	318	U	poly3_min_phases	36
fit_MS01-02-badquality	MJ-01	268	U	poly3_def	36	284	U	poly3_min_phases	36
fit_MS01-03-badquality	MJ-01	274	B	poly3_def	36	286	B	poly3_min_phases	36	286	B	poly3_def
fit_MS01-04	MJ-01	297	B	poly3_def	36	304	B	poly3_min_phases	36	304	B	poly3_min_phases
fit_MS01-05	MJ-01	295	A	poly3_def	36	300	A	poly3_min_phases	36	300	A	poly3_min_phases
fit_MS01-06	MJ-01	302	U	poly3_def	36	306	U	poly3_min_phases	36
fit_MS01-07	MJ-01	287	B	poly3_def	36	296	B	poly3_min_phases	36	296	B	poly3_min_phases
fit_MS01-08	MJ-01	307	B	poly3_def	36	318	B	poly3_min_phases	36	318	B	poly3_min_phases
fit_MS01-09	MJ-01	294	B	poly3_def	36	314	B	poly3_min_phases	36	314	B	poly3_min_phases
fit_MS01-10	MJ-01	321	B	poly3_def	36	335	B	poly3_min_phases	36	335	B	poly3_min_phases
fit_MS01-11	MJ-01	289	A	poly3_def	36	306	A	poly3_min_phases	36	306	A	poly3_min_phases
fit_MS01-12	MJ-01	315	B	poly3_def	36	326	B	poly3_min_phases	36	326	B	poly3_min_phases
fit_MS01-13	MJ-01	315	U	poly3_def	36	326	U	poly3_min_phases	36
fit_MS01-14	MJ-01	295	B	poly3_def	36	305	B	poly3_min_phases	36	305	B	poly3_min_phases
fit_MS01-15	MJ-01	292	B	poly3_def	36	300	B	poly3_min_phases	36	300	B	poly3_min_phases
