# Supplementary material for: Linking Alpine deformation in the Aar Massif basement and its cover units – the case of the Jungfrau-Eiger Mountains (Central Alps, Switzerland)
Source: Copernicus journal article supplement (doi:10.5194/se-2018-49), 2018-06-05
Supplement: Supplementary file [file se-2018-49-AC2-supplement.pdf]

# Authors response to Reviewer comment 1 (by anonymous Referee)

David Mair<sup>1</sup>, Alessandro Lechmann<sup>1</sup>, Marco Herwegh<sup>1</sup>, Lukas Nibourel<sup>1</sup>, Fritz Schlunegger<sup>1</sup>  
<sup>1</sup> Institute of Geological Sciences, University of Bern, Baltzerstrasse 1+3, CH-3012 Bern

5 Correspondence to: David Mair (david.mair@geo.unibe.ch)

## Line by line response

Lines 12- 13 : replace  $\dot{\epsilon} \dot{\gamma} T$  at deformation ranged from  $xx$  : :  $\dot{\epsilon} \dot{\gamma} z$  with : “Deformation temperatures range between  $xx$  and  $xx$ ...”

Response: This has been implemented.

10 Line 14: either “ductilely” or “in a ductile manner”. Here you are using the present tense, on line 13 it’s the past

Response: Both errors were corrected as suggested.

Line 21: “NW-striking” is enough

Response: Indeed; changed to “NE striking” to correct also mislabelling.

15 Line 22: “feature an immense topographic expression”: a complex, but not very clear sentence to say “high altitude”?

Response: This has been clarified. (see next 2 comments).

Line 22: replace “SE-NW striking rim” with “NW striking rim”

Response: done.

20 Line 23: “offset” between what and what?

Response: Offset between the surface elevation. Wording changed to clarify the sentence.

Line 24: replace “the sedimentary” by “its sedimentary” and delete “rocks of the Aar Massif”.

Response: Changed as suggested.

Line 28: Helvetic

25 Response: Error corrected.

Line 29: early stage of what?

Response: Early stage of the Alpine evolution. Sentence was adjusted accordingly.

Line 29: you can decouple from a basement but you cannot decouple from an evolution (at least not in this context).

30 Response: The Alpine evolution of the Helvetic was decoupled from the Alpine evolution of the massifs basement rocks. The sentence and the following sentence were restructured to correctly convey this message.

Line 32: add a 150 years old reference

35 Response: There are several works from the late 19<sup>th</sup> century (i.e. by Escher v. der Linth, 1837; Baltzer, 1880;). They are discussed extensively in the cited references; thus, they are not only cited now, also “references therein“ is added to already cited works.

Line 36: later?

Response: Later In the sense of 2<sup>nd</sup> half of the 20<sup>th</sup> century. Sentence was restructured to avoid time confusion.

Line 39: delete "which"

5 Response: Replaced with "that" in order to correct sentence.

Lines 40 to 43: there is no real usable information for the readers here

10 Response: The sentence lists the main works over the recent years on the deformation and its chronology in the massif, which we feel should be cited in this paragraph, designed to give a brief overview of previous work. We did expand the sentence to specifically provide some information about the methods used by the studies to advance the understanding of the deformation history of the Aar massif.

Line 49: delete "and to fill the knowledge gap".

Response: done.

Line 53: delete "in the field and"

15 Response: Done; replaced with "on the surface" to clarify that not all samples are from the railway tunnel.

Line 56: Delete "In addition...history"

Response: Followed to make the sentence more concise.

Line 62: Repetition of line 20

20 Response: The reoccurring part was deleted to avoid redundancy.

Line 66: "in between": not very clear

Response: Clarified by adding "those gneiss units".

Line 68: SW-strike

Response: done.

25 Line 75: delete "Alpine" and add "of Alpine age" after "metamorphism"

Response: done.

Line 84: Replace "These mechanisms are considered not to..." with "This process does not appear to be"

Response: done.

30 Line 85: Massif Line 86: add reference at the end of sentence Line 86

Response: Reference was added.

Line 86: what sort of deformation fabric?

Response: We do clarify the phrasing here: The mentioned phase was characterized mainly by thrusting. The sentence now reflects this (see also next comment).

35 Line 88: the name of the deformation phase is not so interesting if the kinematics of the deformation are not described.

Response: The kinematic description has been added accordingly.

Line 90: "thrusting": nw-vergent?

Response: The top to NW kinematics are now reflected in the sentence.

40 Line 93: which recumbent fold? Does it have a name? Is it visible in a figure? Any references?

Response: Here, we refer to the recumbent fold that builds the Doldenhorn nappe. We have clarified this point and also added a reference.

*Line 95: what is an inverse succession*

Response: An inverted stratigraphic succession; now labelled accordingly.

5 *Line 100: I would delete "differential"*

Response: Done as suggested.

*Line 101: delete "a phase of"*

Response: done.

*Line 101: strain partitioning": only interesting to know if you describe what is partitioned into what*

10 Response: This has been clarified.

*Line 101: "simultaneously with dextral strike-slip": unclear. Is dextral strike slip part of the partitioning?*

Response: The strain partitioning occurred between the strike slip and NW thrusting. We have changed the structure of the sentence accordingly.

*Lines 103-104: Pfaffenkopf and Oberaar have no references*

15 Response: All references are given at the end of the sentence to avoid giving same references twice within one sentence.

*Lines 104-105: delete "the uplift passively rotated". The uplift is not a force... And add "were passively rotated" after "Doldenhorn Nappes".*

Response: Done.

20 *Line 108: which type of brittle structures?*

Response: This has been specified.

*Line 114: not necessary*

Response: We see the point and did remove the sentence (and adjusted the next one).

*Line 117-118: delete Line*

25 Response: We do not see why this line should be deleted since it provides information about how we have processed the data processing.

*Line 120: "only" should be before, not after mapped*

Response: Done.

*Line 121: delete only*

30 Response: done.

*Line 145: basement*

Response: corrected.

*Line 145: replace "are present as" with "consist of"*

Response: done

35 *Line 148: what is a "granodioritic texture"? Magmatic texture?*

Response: There has been a mistake in the original draft. Both coarse- and fine-grained textures are granoblastic, for which we apologize. We have corrected the sentence accordingly.

*Line 152: delete "see also"*

Response: done.

Line 155: *evidence*

Response: corrected.

Lines 174-176: *delete sentence*

Response: We agree and have deleted the sentence.

5 *Lines 180: brittle shear zone?*

Response: Changed to “brittle faults forming along former shear zones” for clarification purposes.

Lines 181-182: *“Note that...sediments” doesn’t need to be between parentheses*

Response: It has to be. It is intended to point out why we start with SZ2 in the basement. Therefore, we prefer to keep it in parentheses.

10 *Line 182: replace “faulting behavoiur” with kinematics*

Response: done.

Line 183: *“However” ???*

Response: Corrected. The unfitting word “However” was removed.

Line 183: *I cannot see the offset of older structures in Fig. 5b*

15 Response: The SZ2 structures are cut in the footwall by the SZ3 thrusts running through the JSW sediments in Fig. 5b. We do find the offset rather illustrative. However, we added also a reference to Fig. 5c as this image also illustrates the cross-cutting relationship.

Line 189: *no dot after SZ2*

Response: done.

20 *Line 189: “offsets”: this could give you a shear sense? Why is there no shear sense described?*

*Looking at Fig. 6 I do not find the distinction of SZ2 and SZ3 convincing based on the orientation data. The Rottal net shows a possible distinction into two groups based on the different dip, but there aren’t many data and even there it could be one population only. The Trugberg net doesn’t show two “populations” in my view.*

25 Response: The offset could give us a crude information about the shear sense: top to NW for normal faulting and top to SE for reverse faulting. However, we refrain from this since we do not have lineation data for this data set (as the Trugberg set is inferred from remote sensing). For the Rottal we present information about the shear sense for SZ2 (Line 183: “dominantly top to the NW shear senses”). For SZ3 we now added a sentence where we outline the predominantly top NW-directed thrusting. Regarding the distinguishing of SZ2 and SZ3 in the data for Fig. 6.: We did not differentiate the phases based on the orientation only; we rather measured 2 sets of SZ orientation in the field (Rottal) and via remote sensing (Trugberg). We thus distinguished these phases based on the combination of data of various sources. We admit that the orientation net for the Trugberg itself would not warrant a subdivision of 2 phases.

35 *Line 190: “wider”: give an idea*

Response: Given in parenthesis.

Line 190: *replace “occurred” with “is”*

Response: done.

Lines 190-193: *any references to figures?*

40 Response: Reference to Fig. 5 was inserted.

Line 193: *“kinematics”: you did not say much about it in the last lines (see comment on Line 189)*

Response: We acknowledge the need for more clarity. We thus changed the text accordingly. (see response to comment on line 189) and additionally added a shear sense statement. Thus, we now hope to have clearly stated what kinematics each phase is associated with.

*Lines 201-204: a verb is missing in this sentence*

5 Response: Corrected by removing the superficial “that”

*Line 210: I doubt it...Mapping certainly reveals something, but I guess something else.*

Response: The whole sentence is indeed unnecessary and has thus been removed.

*Line 213: why “the first”? It was not mentioned that there were many. Is it S1?*

10 Response: In lines 210 to 213 we describe the characteristics of S1 and label it. With this sentence we state that this is the first foliation formed in the sedimentary rocks (as it overprints the bedding but is overprinted by all later structures). We added “(S1)” after mylonitic foliation for clarification purposes

*Line 214: what is the spacing of mylonitic foliations? Spacing between shear zones?*

Response: We rephrased the sentence to clarify.

15 *Line 217: The reference to Fig. 7c comes after “more than one def phase”, but it doesn’t show that. It only shows the boudinage.*

Response: The reference was misplaced and is moved to the appropriate place in the sentence as we intend to illustrate the impressive boudins made up of dolomites. Yet it still shows minor multiphase deformation.

20 *Line 219: past tense (led) not always used in the text. Reference to maps and figures?*

Response: Done.

*Line 222: argument for the synchronous development of S1 and SZ1?*

25 Response: We do see that the statement of synchronous development is misplaced here as we give our argument for it in Sect. 5.3.1 in the discussion section. Thus, we replaced it with observations that indicate contemporary formation. (parallel orientation of S1, SZ1 and foliation spacing decreasing towards SZ1).

*Line 223: what is the shear sense of these shear zones?*

30 Response: This is difficult to specify due to the later deformation that partly rotated the orientation of the sedimentary stack. We do see a general top to NW trend of shearing and thrusting. We now added an according statement in a sentence to address this and to highlight the thrust nature (see next comment on Line 225).

*Line 225: it needs to be stated before that these shear zones are thrusts. And what displacement direction?*

Response: Done (see also previous comment).

35 *Line 225: “of” the footwall rather than “in”?*

Response: Corrected.

*Line 227: subsequent to what?*

Response: Here, we refer to the phase of thrusting (SZ1) and the contemporaneous formation of S1, which constitutes deformation stage 1 in our framework; the text was adjusted accordingly.

Line 228: *what is a rotated sigma clast? And...why does a rotated sigma clast indicate rotation of the initial structures? And... what deformation phase causes an anticlockwise rotation of some 50, looking East? "As a result": of something that is not really explained.*

5 Response: Misleading sentence in our previous version. Rotation is documented by rotated textures (i.e. bedding in competent units) within sigma clasts along with rotation and folding of S1 parallel veins. The rotation we discuss in this context occurs in section view looking east (not in map view). We rewrote the corresponding paragraph to clarify these points.

Line 229: *what are EN and EW?*

10 Response: Some regions in which the structural data was collected. This was clarified and references to Figs. 2 & 9 were added.

Line 230: *"This deformation stage": I am lost. Which one? The one that rotated the fabrics? What are the kinematics of this deformation?*

15 Response: The second stage rotated preexisting structures by local folding (see also response to comment on Line 231). We rewrote the corresponding paragraph for clarification purposes. We also added a kinematic description.

Line 230: *how do you know it is not preserved?*

Response: We realized that our original statement was confusing and not really needed so we removed it to increase conciseness and clarity.

20 Line 231: *"and the folding": so this deformation phase is the folding? What axial plane and fold axes orientation?*

25 Response: This deformation is characterized in the sediments by local folding near the basement cover contact, and it intensified towards the SE (= towards the more internal). Steep SE dipping axial planes and SW/W to NE/E striking folding axis are dominant, but they can be locally complex and chaotic. We now explicitly state this in the rewritten paragraph (see also responses to comments on Lines 228 & 230).

Line 233: *"Subsequent NW directed shearing": not easy to understand and visualize and I cannot really see it in Fig. 11b that is quoted at the end of the sentence. Where do I see the flat-lying limbs? What is the evidence for a subsequent NW-directed shearing in the first place?*

30 Response: The reference to Fig. 11b is incorrect, instead Fig. 10a is now correctly referenced. We further added several references to Fig. 7 to illustrate our points. We do see several thrusts that offset S1, S2 and SZ1 and therefore had to occur later (see. Figs. 2,10,11c). These thrusts are the reason we see basement rocks in the summit region of the Eiger-, Moench and Jungfrau summit, right on top of Mesozoic sediments. Along these thrusts the S3 foliation intensifies, and we measured a swath of stretching lineations on S3-parallel slip planes with top to NW shear sense (Fig. 9). We have adjusted the text to clarify this (see also the newly added Figs. 10a,b and the next responses to comments on Line 234).

Line 234: *"now": do you think the limbs were initially steep?*

40 Response: We do think that the limbs formed as intermediate-steep SE imbricate stack by fault propagation folds. The subsequent folding and thrusting led to their current flat lying position in the frontal part and folds in the internal SE part.

Line 234: *this observation of the result should be described by a photo or sketch of the structures, not by a schematic recap of the Discussion/Conclusions.*

Response: We agree and added new Figures to illustrate specifically the cross-cutting and overprinting relations of key structures (now Figs. 10a,b).

*Line 234-235: S3? How can one distinguish S3 from S2 that are sometimes parallel?*

Response: S3 formed sometimes (not always) parallel to S1 (not S2!). Often S3 foliation and SZ3 thrusts cut S1 with a small angle, yet sometimes the form at a very high angle to each other (as illustrated in Figs. 7a,b). This usually occurs when S1 structures were rotated during the phase forming S2 structures. S3 structures have a similar orientation and a shared SE to NW evolution. This evolution is characterized by SE dipping in the SE to flat and slightly NW plunging in the NW (Figs. 10,11). We adjusted the text of the whole section to better describe these observations. We also added the new Figures (10b,c) to further document the cross-cutting and the incorporation of basement slivers at different stages.

*Line 236: difficult to follow. Why is it really necessary to distinguish an S3 from an S2 here?*

Response: We actually distinguish S3 from S1. S1 is folded by stage 2 deformation that produced a weak S2 axial plane foliation. Both are cut by S3 structures.

*Line 237: which one is the “same” orientation?*

Response: We intend to mention that S3 features a fairly ‘consistent’ orientation throughout the study area; see response to comments on Lines 234-235.

*Lines 210-240: not easy to follow, especially the mixture of orientation with cross-cutting relationships and of microstructural characteristics.*

Response: We saw the need to rephrase the entire paragraph for clarification purposes.

*Line 243: what does oblique mean here? Kinematics of these faults?*

Response: Oblique refers to the general orientation of the faults as well as the shear sense (strike slip with reverse/normal fault behavior). We amended the text to reflect that.

*Line 258: specify and justify the geothermal gradient used for the conversion of T in depth*

Response: We use a uniform averaged geothermal gradient of 27 °C km<sup>-1</sup> for the upper crust as often given with a range of 25° to 30° C km<sup>-1</sup> for the continental lithospheric crust (Pollack and Chapman, 1977). It seems reasonable for the youngest exposure history of the Aar massif (~26-28 °C km<sup>-1</sup>; Valla et al., 2016; Schlunegger and Willett, 1999) and is close to the inference by Glotzbach et al. (2010) of 25 °C km<sup>-1</sup>. The reason for the depth estimation was to highlight the rather shallow position during peak T of Alpine deformation (especially compared to southern Aar massif; Herwegh et al., 2017). We recalculated the depth estimation for the given gradient of 27° C km<sup>-1</sup> and added statements in in the main text to address this properly with 3 new references.

*Line 266: evidence for being deformed as an “ensemble”?*

Response: They share the same deformation fabric, same RSCM peak temperature, which we describe in Sect. 4.2.2 (as it is now referenced in the sentence). We have clarified this point.

*Line 267: consistent? With what?*

Response: Internally consistent. Sentence was changed accordingly.

*Line 268: less shortening: evidence? Quantified?*

Response: We did not (yet) quantify the individual offset along strike, but gave a qualitative statement based on the map view. We added a statement to clarify this point.

*Lines 269-270: why?*

Response: The steepening occurred mostly during SZ2, due to the large differential block uplift in the basement (SZ2) that passively steepened the sedimentary cover in the SE. A statement was added to clarify this.

*Line 272: The cover-sediment interface?*

5 Response: We wrote “cover sediments” which we rephrased to “sedimentary cover” to avoid possible confusions.

*Line 283: why “already”?*

Response: No need for this; deleted.

10 *Line 284: has this wedging been described before in the text? Wedging associated with folding? I am lost...*

Response: This particular wedging-in refers to a pre-Alpine event, which we take from literature survey. An additional reference was added, where an up-to-date and extensive discussion of this Pre-Alpine evolution is presented. We want to highlight the already existing structures before the Mesozoic.

15 *Line 286: evolution of what?*

Response: The pre-Alpine basement gneisses. Sentence was amended accordingly.

*Line 289: succeeding???*

Response: changed to Alpine.

*Line 293: favorable for what?*

20 Response: for localization of Jurassic normal faults. Sentence was adjusted to clarify.

*Lines 295-301: I am not sure why these observations are important in the context of the results session and of the paper.*

25 Response: We do generally find the relative consistency of the strata remarkable. We briefly discuss the main trends in the stratigraphy that allows us to differentiate tectonic from stratigraphic features of the map (Fig. 2). We consider this brief section essential for our understanding of how we can differentiate and map the different tectonic slivers.

*Lines 302-305: why to mention an own stratigraphic model here that was not presented in the results?*

30 Response: We do present a stratigraphic model in the Appendix A and discuss the main findings in Sect. 4.1.2. The reason for giving the details in the Appendix is that for almost the entire stratigraphic units we confirm previous field data, thus there is not much new insight. Yet most references are quite old, and literature spans several decades, leading often to different and outdated interpretations. Furthermore, there is no consistent and up-to-date stratigraphic model for the region. We thus saw the need to conduct such a compilation (see also previous 2 comments).

*Lines 305-307: I am still not sure about the importance of these lines.*

35 Response: See previous 3 comments and responses, respectively.

*Line 311: Substratum T constrained by RSCM?*

Response: Since the sedimentary cover is still in place on top of the substratum, the inferred Alpine RSCM temperatures are also constraining the T in the underlying basement. We added “Alpine” to the sentence to clarify that we explicitly address the shared peak T.

40 *Line 311: why to give an upper limit to calcite thermometry and mention calcite thermometry at all?*

Response: The sentence was misleading. It should convey that the upper temperature constraint is given by the RSCM at around ~320 °C. We rephrased the sentence to clearly state that now.



Line 314: *ok, but you should also quote the lower T suggested by XX and White. I think it must be Burkhard, 1993, not Burkhard, 1990.*

Response: Done. We adapted the lower boundary to the lower boundary suggested by Kennedy & White (2001) and reference the work. Burkhard reference was corrected.

5 *Line 322-323: repetition of line 317*

Response: Very similar indeed. To avoid redundancy and increase conciseness we removed the last 2 sentences of the paragraph (see also comment and response below).

Line 323: *well, I am not sure that this can be constrained. The only thing that can be said is that T of 270°C was attained following the recrystallization T inferred by Stipp et al., 2001. What is known about the T peak anyway?*

10

Response: Indeed, we can only constrain the formation to the T window of <330 °C to 270 °C. Since from our data we do not have chronological constraints, we cannot state how close (or not) to peak T the deformation occurred. Therefore, we removed the last sentence.

*Line 325: pelitic*

15

Response: Corrected.

*Line 325: synchronously: what is the evidence?*

Response: We see a parallel orientation of S1 and SZ1; both share the same response to the later deformation (i.e. being cut or modulated by local folding). The evidence for the synchronous formation is now presented with more clarity in Sect. 4.2. and Figs. 10a,b.

20

*Line 326: delete “rheological”*

Response: done.

*Line 333: was it quantified? What is the evidence?*

Response: It was not quantified by retro-deformation; the presented several-km shortening is an estimation and is derived from the preserved offsets within the map (Fig. 2) and the profile (Fig. 10). The thrusts themselves are easily identifiable (Collet & Parejas, 1931) in the field (i.e. by the offset of the Mesozoic strata and basement rock incorporation; see also Figs. 2,10). The evidence for the thrusts is now presented with more clarity in Sect. 4.2. and Figs. 10a,b.

25

*Line 344: was really shown that incorporation of basement slivers in the cover is associated to the 1<sup>st</sup> deformation phase?*

30

Response: We do agree there is need to better show this wedging-in. We do so by adding Figs. 10a,b to explicitly illustrate the incorporation and the resulting cross-cutting relations.

*Line 361: how significant?*

Response: At least > 2 km in the JSW in the Rottal section (as can be seen in Figs. 2 & 10). An related statement was added in parenthesis with reference to Fig. 10.

35

*Line 365: repetition of 361*

Response: Removed to avoid redundancy.

*Line 369: so why should they be called shear zones?*

Response: We address this by clarifying the wording and now calling them faults (F1 for the steep faults; “Gadmen” of Berger et al. 2017; and F2 for the oblique to strike slip set; “a-c” joints of Ustazeswksi et al., 2007). We rephrased the last paragraph of Sects. 4.2.1, 4.2.2 and concerning parts in section 5.3.3. We corrected the names in Fig. 9 and added a clarification to the caption of Fig. A2.

40

Line 380-384: *So S1 is at < 330\_C, shows dynamic rexx of quartz, but no fabric in the basement, as stated in Line ...?*

5 Response: We do indeed not see any related deformation in the basement, otherwise we would expect to find some fabric formed by dynamic recrystallization. S1 and SZ1 are only found in the sedimentary cover.

Lines 386 – 388: *so ... under which T conditions did these shear zones develop?*

Response: The structures of SZ1 or SZ2 formed under similar conditions, maybe with slightly lower temperatures for SZ2. We stated so previously in Sect. 4.2 and do now so in more clarity in the revised manuscript (see also comments and responses on Lines 183 to 266).

10 Lines 390-392: *An amazing change of scale of interpretation!*

Response: We rephrased the sentence to clearly indicate the large-scale linkage to orogenic processes.

Lines 394-395: *3remaining compressional orogenic forces”: I think these speculations are not really necessary.*

15 Response: We agree that this discussion goes beyond the scope of this paper, and therefore (and to ensure a concise paper) the half-sentence was removed.

Line 400: *“aggravated”: aggravating a link? First, it sounds quite dramatic, second it’s not the link, but its interpretation that may be “aggravated”*

Response: Corrected to “characterized”.

20 Line 404: *“is key”: structure of the sentence needs to be reconstructed.*

Response: The sentence was split into two and the redundant “is key” was deleted.

Line 405: *“and discrete”:*?

Response: Unnecessary words were removed to make the sentence more concise.

Lines 404-406: *“while” and “whereas” is too much for the same sentence. Needs to be reformulated.*

25 Response: “whereas” changed to “despite”.

Line 406: *“bulk of the rock behaved in a brittle manner”: do you mean that between the shear zone the rock was also deforming but in a brittle manner? Not clear.*

Response: Clarified by specifically labelling the bulk of the crystalline basement rocks as the brittle behaving.

30 Line 410: *“multiphase tectonics”: strange term.*

Response: Changed to “multiphase deformation”.

Lines 411- 412: *“the structural imprint ... .sets up the stage for erosion”: strange statement. I guess the authors wish to say that the steeply oriented displacements created uplift and exhumation by erosion?*

35 Response: This is a misunderstanding. In fact, the steep displacements in combination with the subsequent thrusts provided ideal boundary conditions for preferential erosion to produce the morphological contrast in front of the Aar massif. The sentence was modified accordingly.

40

## References

- Berger, A., Wehrens, P., Lanari, P., Zwingmann, H. and Herwegh, M.: Microstructures, mineral chemistry and geochronology of white micas along a retrograde evolution: An example from the Aar massif (Central Alps, Switzerland), *Tectonophysics*, 721, 179–195, doi:10.1016/j.tecto.2017.09.019, 2017.
- 5 Burkhard, M.: Calcite twins, their geometry, appearance and significance as stress-strain markers and indicators of tectonic regime: a review, *J. Struct. Geol.*, 15(3–5), 351–368, doi:10.1016/0191-8141(93)90132-T, 1993.
- Burkhard, M.: L’Helvétique de la bordure occidentale du massif de l’Aar (évolution tectonique et métamorphique), *Eclogae Geol. Helv.*, 81(1), 63–114, doi:10.5169/seals-166171, 1988.
- 10 Collet, L. and Paréjas, E.: Géologie de la chaîne de la Jungfrau, *Beiträge zur Geol. Karte der Schweiz*, n.s. 63, 1931.
- Glotzbach, C., Reinecker, J., Danišík, M., Rahn, M., Frisch, W. and Spiegel, C.: Thermal history of the central Gotthard and Aar massifs, European Alps: Evidence for steady state, long-term exhumation, *J. Geophys. Res.*, 115(F3), F03017, doi:10.1029/2009JF001304, 2010.
- 15 Herwegh, M. and Pfiffner, O. A.: Tectono-metamorphic evolution of a nappe stack: A case study of the Swiss Alps, *Tectonophysics*, 404(1–2), 55–76, doi:10.1016/j.tecto.2005.05.002, 2005.
- Herwegh, M., Berger, A., Baumberger, R., Wehrens, P. and Kissling, E.: Large-Scale Crustal-Block-Extrusion During Late Alpine Collision, *Sci. Rep.*, 7(1), 413, doi:10.1038/s41598-017-00440-0, 2017.
- 20 Kennedy, L. A. and White, J. C.: Low-temperature recrystallization in calcite: Mechanisms and consequences, *Geology*, 29(11), 1027, doi:10.1130/0091-7613(2001)029<1027:LTRICM>2.0.CO;2, 2001.
- Stipp, M., Stünitz, H., Heilbronner, R. and Schmid, S. M.: Dynamic recrystallization of quartz: correlation between natural and experimental conditions, *Geol. Soc. London, Spec. Publ.*, 200(1), 171–190, doi:10.1144/GSL.SP.2001.200.01.11, 2002.
- 25 Ustaszewski, M., Herwegh, M., McClymont, A. F., Pfiffner, O. A., Pickering, R. and Preusser, F.: Unravelling the evolution of an Alpine to post-glacially active fault in the Swiss Alps, *J. Struct. Geol.*, 29(12), 1943–1959, doi:10.1016/j.jsg.2007.09.006, 2007.
- Valla, P. G., Rahn, M., Shuster, D. L. and van der Beek, P. A.: Multi-phase late-Neogene exhumation history of the Aar massif, Swiss central Alps, *Terra Nov.*, 28(6), 383–393, doi:10.1111/ter.12231, 2016.

# Linking Alpine deformation in the Aar Massif basement and its cover units – the case of the Jungfrau-Eiger Mountains (Central Alps, Switzerland)

David Mair<sup>1</sup>, Alessandro Lechmann<sup>1</sup>, Marco Herwegh<sup>1</sup>, Lukas Nibourel<sup>1</sup>, Fritz Schlunegger<sup>1</sup>

5 <sup>1</sup> Institute of Geological Sciences, University of Bern, Baltzerstrasse 1+3, CH-3012 Bern

*Correspondence to:* David Mair (david.mair@geo.unibe.ch)

**Abstract.** The NW rim of the external Aar Massif was exhumed from ~10 km depth to its present position at 4 km elevation above sea level during several Alpine deformation stages. Different models have been proposed for the timing and nature of these stages. Recently proposed exhumation models for the central, internal Aar Massif differ from the ones established in the covering Helvetic sedimentary units. By updating pre-existing maps and collecting structural data, a structural map and tectonic section was reconstructed. Those were interpreted together with micro-structural data and peak metamorphic temperature estimates from collected samples to establish a framework suitable for both basement and cover. Deformation ~~T~~temperatures ~~at deformation ranged between~~ from 250°C ~~to and~~ 330°C allowing for semi-brittle deformation in the basement rocks, while the calcite dominated sediments-sedimentary rocks deform ~~ductile in a ductile manner~~ at these conditions. Although field data allows to distinguish multiple deformation stages before and during the Aar Massif's rise exhumation, all related structures formed under similar P, T conditions at the investigated NW rim. In particular wWe find that the exhumation occurred during 2 stages of shearing in the Aar Massif's basement, which induced in the sedimentary rockss first a phase of folding and then a period of thrusting, accompanied by the formation of a new foliation. We can link this uplift and exhumation history to recently published large scale block extrusion models.

## 20 1 Introduction

The Aar Massif is the largest External Crystalline Massif (ECM) in the Alps, made up of exhumed pre-Triassic basement rocks and Mesozoic to Cenozoic sedimentary cover ~~sediments-rocks~~ along its NWE ~~to SE~~-striking frontal margin. In this region, the Eiger, Moeönch and Jungfrau mountains in the Swiss Alps feature an immense topographic expression along this SE-NW-striking rim, with north faces that are characterized by almost 1800 m of vertical-difference in elevation~~offset in~~ their north faces. Throughout their stepwise, pyramidal headwalls these mountain ranges expose both the pre-Alpine crystalline substratum and the itsat Mesozoic ~~sedimentary cover.~~ rocks of the Aar Massif. These scenic outcrops are thus key to understanding the Massif's exhumation from ~10 km depth to its present position at 4 km elevation above sea level. Therefore, these mountains have been the focus of a long tradition of structural research, which yielded a general picture of a steeply dipping autochthonous sedimentary cover ~~sediments~~ in front of an up-domed ECM (e.g.i.e. Pfiffner, 2014). Further to the NW are the detached fold-and-thrust nappes of the Upper Helvetics, the, which's Alpine evolution of which isare

considered to have been decoupled from the massif's ~~Alpine evolution/development~~ in an early stage. ~~and~~ the Helvetic units have experienced a phase of passive up-doming in response to the rise of the Aar Massif after their displacement into a frontal position in the NW during the Oligocene (e.g. Schmid et al., 2004, Hänni ~~&~~ Pfiffner, 2001). The lithostratigraphic and tectonic studies, which resulted in the reconstruction of this scenario, have been conducted over the course of more than 150 years (e.g. Escher von der Linth, 1839; Baltzer 1880) and have mainly been focused on a few key regions of this ECM. These mainly include: The S and SW sectors of the Aar Massif (i.e. Kraysenbühl ~~&~~ Steck, 2009; Herwegh ~~&~~ Pfiffner, 2005; Steck, 1984; Steck, 1968), and the area surrounding the Jungfrau and the Moeönch mountains (i.e. Rohr, 1926; Scabell, 1926; Collet and Paréjas, 1931; Günzler-Seifert ~~and~~ Wyss 1938; Kammer, 1989 ~~and references therein~~). Farther to the NW ~~in the region of the Bernese Oberland~~, the neighboring Mesozoic sedimentary rocks have been studied ~~later~~ in detail, an overview is found in (i.e. Hänni ~~&~~ Pfiffner, (2001); Menkveld, (1995); Pfiffner, (1993) and references therein).

The best-studied region of the Aar Massif is the Haslital ~~that, which~~ stretches from Innertkirchen up to the Grimsel Pass (Abrecht, 1994 and references therein) and which exposes the crystalline rocks of what has been referred to as the Central Aar Massif. ~~A swath of petrological and chronological data~~ New <sup>40</sup>Ar/<sup>39</sup>Ar and Rb/Sr ages for syn-kinematically formed fault zone micas (i.e. Challandes et al., 2008; Rolland et al., 2009; Schaltegger et al.; 2003) together with structural observations (i.e. Wehrens et al., 2017, Wehrens et al., 2016;) and K-Ar ages for fault zone micas (Berger et al., 2017a) advanced ~~our~~ the understanding on the geodynamic evolution of the Aar Massif. ~~This culminated in a new model for the exhumation of the Aar Massif (Herwegh et al. 2017)~~ A compilation of peak metamorphic temperature and deformation age data as well as calcite-dolomite geothermometry, culminated in a new model for the exhumation of this unit (Herwegh et al. 2017), and in a new regional-scale geological map (Berger et al., 2017b). Nevertheless, details about how the tectonic deformation affected the crystalline basement and the sedimentary cover rocks of Aar Massif, and if and how this deformation propagated into the sheared-off Helvetic nappe system in front of the Massif have not been explored in detail for the Jungfrau-Moeönch area. This is mainly due to the complexity of the geologic architecture and the inaccessibility of the area that have thwarted a precise reconstruction of the history ~~and the amount of shortening~~ of the frontal part of this Massif. It is the scope of this paper to link the tectonic history of these uplifted basement blocks to the structures in the cover ~~and to fill this knowledge gap~~.

Here, we reconstruct the relative chronology of the frontal part of the Aar Massif in 3D. We focus on the central part presently exposed in the Central Swiss Alps, where this contact is exposed c. 12km along the strike of the basement cover ~~boundary~~ interface. We proceed through (i) establishing a synthesized lithostratigraphic framework for the region, (ii) collecting new structural data and samples on the surface in the field and along the “Jungfraubahnen” railway tunnel that crosses the mountain range, and through (iii) modeling the tectonic architecture with GIS and Midland Valley’s (new Petex) Move™ software package. We differentiate the sedimentary cover ~~sediments~~ rocks based on stratigraphic criteria, which in turn allows us to reconstruct the geometry of the exposed units. ~~In addition, s~~ Structural data analysis enables us to unravel

65 their relative deformation ~~history~~, while Raman Spectroscopy on Carbonaceous Material (RSCM) yields estimates on peak metamorphic temperature. Our synthesis of existing data together with new observations finally allows us to link the fabric of the sedimentary cover ~~sediments-rocks~~ with the underlying basement units' evolution for one of the Alps' most famous scenery. This results in a new picture of how the differences in rheology have controlled both mesoscale deformation structures and micro-scale deformation style as well as the bedrock fabric of the crystalline basement and the overlying sedimentary cover lithologies.

## 70 2 Geological setting

### 2.1 Tectonic architecture

The Aar Massif is ~~the largest External Central Massif (ECM) in the Alps and is~~ made up of polymetamorphic pre-Variscan gneisses with intruded post-Variscan granitoids (Labhart, 1977; Abrecht, 1994). The most external polycyclic gneiss unit is exposed along the Aar Massif's northwestern rim, referred to as the Innertkirchen-Lauterbrunnen zone (ILZ; Berger et al., 75 2017~~ab~~; Abrecht, 1994; Fig. 2). Farther to the SE, the Erstfeld Zone exposes gneiss units (EZ; Abrecht, 1994) and occurs in a hanging wall position to the ILZ (Berger et al., 2017b; Fig. 2) with ~~sediments~~ sedimentary rocks squeezed in-between ~~these two gneiss units~~. This tectonic sliver made up of sedimentary and crystalline rocks is referred to as Jungfrau-Sediment-Wedge (JSW). Both units share a concordant overall SW-NE strike direction of structures such as lithological boundaries and foliations (Oberhänsli et al., 1988). These pre-Variscan basement units experienced multiple periods of deformation and 80 metamorphic overprint, which occurred during the Proterozoic, Ordovician, Variscan, the Late Cretaceous and the Cenozoic (Steck, 1968; Labhart, 1977; Schaltegger, 1993; Schaltegger et al., 2003). In our study area (Fig. 1) and farther to the west, the EZ is separated from the ILZ by this wedge of Mesozoic ~~sediments~~ sary rocks (Krayenbuhl ~~and~~& Steck, 2009; Herwegh ~~and~~& Pfiffner, 2005; Steck, 1968). Additional autochthonous Mesozoic sedimentary cover ~~sediments-rocks~~ are present at the NW rim of the Aar Massif (Kammer, 1989), where they form an own, detached and transported nappe system (Doldenhorn 85 nappe; Herwegh ~~and~~& Pfiffner, 2005; Burkhardt, 1988).

The sediment wedges and the Mesozoic cover were only affected by ~~Alpine~~ deformation and metamorphism of Alpine age. In the study area, the Alpine metamorphic overprint occurred under lower greenschist metamorphic conditions (Frey ~~and~~& Mählmann, 1999; Niggli ~~and~~& Niggli, 1965), which is recorded by the occurrence of distinct metamorphic index minerals and illite crystallinity. The peak metamorphic temperatures increased towards the SE, where conditions of ~450°C and 6.5 90 kbar have been reconstructed for the Central Aar Massif granitoid shear zones (Challandes et al., 2008) at a time around 20 Ma (Wehrens et al., 2017; Herwegh et al., 2017).

## 2.2 Alpine structural evolution

The structural imprint of this ECM has been related to various deformation stages by multiple authors (Table 1), often depending on ~~the~~ site-specific conditions. This resulted in the generally accepted notion that during the late Eocene, the Helvetic sedimentary nappes were detached from their crystalline substratum situated farther to the SW (Pfiffner, 2014; Herwegh ~~&~~ Pfiffner, 2005; Burkhard, 1988). ~~This~~ ~~these mechanisms-process~~ ~~appears not~~ to be recorded by the structural fabric in the Aar Massif's basement (Wehrens et al., 2017; Berger et al., 2017a). This has been used as ~~argument in geodynamic work~~ to disconnect the evolution of the basement rocks from that of the Helvetic cover ~~sediments nappes (e.g. Pfiffner, 20154)~~. An early ~~deformation fabric assigned to phase of NW directed Helvetic thrusting~~, the “Plaine Morte” phase of deformation, is recorded in the western Central Helvetic units only (Burkhard, 1988; Pfiffner, 2014). The subsequent Oligocene phases of deformation, which were referred to ~~as~~ the “Prabé” phase in the west and “Calanda” phase (Milnes and Pfiffner, 1977) in the east of the Helvetic nappes (Burkhard, 1988; Pfiffner, 2014), were associated with the main phase of ~~top to NW dominated thrusting within the Helvetic units, and they are recorded by a penetrative foliation. dominated thrusting within the Helvetic units and are recorded by a penetrative foliation.~~ Further shortening led to the formation of the Doldenhorn nappe (former Infrahelvetic and ~~new-now~~ Lower Helvetic), when a former half graben basin was inverted and incorporated into the Alpine edifice. This phase of deformation, which has been referred to as the “Kiental” phase (Herwegh ~~and~~ Pfiffner, 2005; Burkhard, 1988), produced a large-scale recumbent fold (~~Doldenhorn fold sensu stricto~~) and likewise induced ~~a period of~~ passive folding in the overlying Helvetic nappes. By the end of this phase, ~~at~~ around 20 Ma, the Helvetic nappes (~~Upper Helvetics~~) ~~existed in positions~~ ~~were placed~~ in front and on top of the future Aar Massif with ~~an inverted stratigraphic an inverse~~ succession, where the Autochthon and the Doldenhorn nappe (~~Lower Helvetic~~) were ~~situated~~ below these nappes (Herwegh ~~and~~ Pfiffner, 2005).

The exhumation history of the crystalline basement rocks of the Aar Massif, generalized as “Grindelwald” phase (~~Güntzler-Seifert, 1945;~~ Burkhard, 1988), records the following multistage late-Alpine deformation sequence: (i) First, steeply south dipping reverse and normal faults developed a set of pervasive shear zones during the “Handegg” ~~phase of~~ deformation (Wehrens et al., 2016; Wehrens et al., 2017), with a progressively increasing ~~differential~~ uplift component towards the south (Herwegh et al., 2017). ~~Subsequently This was followed by;~~ a phase of strain partitioning ~~occurred simultaneously~~ with (ii) dextral strike slip to oblique slip shearing along NW-SE and WNW-WSE trending faults (“Oberaar” phase) in the south and (iii) NW directed thrusting (“Pfaffenchopf” phase) along moderately southeast dipping fault planes (Labhart, 1966; Wehrens et al., 2016; Wehrens et al., 2017; Herwegh et al., 2017; Berger et al., 2017a). During this latter deformation phase, ~~the uplift~~ ~~passively rotated~~ the former main thrust faults and foliation of the Helvetic and Doldenhorn nappes ~~were passively rotated~~ (Burkhard, 1988). This ~~supposedly was inferred to have resulted in lead to~~ the present, almost vertical orientation of the main Helvetic thrust in front of the Eiger (Pfiffner, 2014). The latest deformation stage (“Gadmen” phase) is recorded by a steep, NE-SW trending northern block with brittle deformation structures, ~~which are characterized by mostly steep, cataclastic reverse and normal faults with cm-sized offsets;~~ (Labhart, 1966; Berger et al., 2017a).

### 125 3 Methods and data

A regional structural map was produced (Fig. 2) with the aid of remote sensing techniques. This map was reconstructed by compiling geological and structural information from previous maps (for a review of the data sets used see Appendix A). These were verified and updated by own mapping in the field. Special focus was directed towards the mapping of stratigraphic contacts in the sedimentary cover ~~sediments-rocks~~ and of shear zones in the basement, both on outcrop and regional scales. ~~Field mapping was done using the 1:25'000 Topographic Map of Switzerland as basis, which was enlarged to a working scale of 1:10'000.~~ We ~~additionally~~ employed high resolution orthophotos (raster resolution 0.25 x 0.25 m; provided by swisstopo) and a high-resolution digital elevation model (swiss ALTI3D, version 2013 provided by swisstopo) as basies for mapping. Structural data (orientation of bedding, lithological contacts, foliation, lineation and faults) were collected with a traditional geological compass and a handheld GPS. The structural dataset was expanded by producing a lineation-lineament map, i.e. fault induced morphological incisions, thereby following the workflow of Baumberger (2015), Baumberger et al. (in press) and Schneeberger et al. (2017), which in turn is based on Rahiman ~~&~~ Pettinga (2008). We only mapped ~~only~~ lineaments that were visible both on the DEM and aerial images, and that were readily identifiable in the field. Lineaments that were observed on remotely sensed datasets ~~only~~ are indicated as “inferred”. Orientations thereof were obtained by plane fitting through moment of inertia analysis of georeferenced point data using the method of Fernández (2005). In addition, we completed the geologic map through collection of geologic information in the “Jungfraubahnen” railway tunnel. The tunnel runs oblique to parallel to the striking direction of the main structural elements between ~3000 m elevation in the E and ~3400 m in the west (Fig. 2).

The map was combined with microstructural observations on thin sections. Thin sections were cut parallel to stretching lineation and normal to foliation planes, thus allowing shear sense directions to be identified. In addition, we used thin section observations to qualitatively estimate the temperature ~~conditions~~ during peak metamorphic conditions and during periods of dynamic recrystallization of quartz and calcite aggregates.

Raman spectroscopy on carbonaceous material (RSCM) was used for peak temperature estimations recorded by the Mesozoic ~~sediments~~ sedimentary rocks. The RSCM technique quantifies the degree of graphitization in meta-sediments, which is a reliable indicator of peak metamorphic temperature (Beysac et al., 2002). RSCM measurements were performed with a Jobin Yvon LabRAM-HR800 instrument at the Institute for Geological Sciences at the University of Bern. An Nd-YAG continuous-wave laser (20 mW beam spot of 1  $\mu$ m diameter and wavelength of 532.12 nm) focused through an Olympus BX41 100x confocal microscope was used. The acquisition of the Raman spectra was monitored with the Labspec 4.14 software of Jobin Yvon. Curve fitting (for histograms see Appendix B) and temperature estimation followed strictly the procedure described in Lünsdorf et al. (2014), Lünsdorf and Lünsdorf (2016) and Lünsdorf et al. (2017). The absolute temperature calibration-based error is in the order of  $\pm 40^\circ\text{C}$ , however, relative temperature differences can be resolved down to  $\pm 15^\circ\text{C}$  (Lünsdorf et al., 2017).



## 4 Results and interpretation

We present an inventory of structural rock fabrics (both on outcrop and microscale) of the studied area. These fabrics developed during Alpine deformation and are different for the [sedimentary cover](#) ~~sediments~~-[rocks](#) and for the basement ~~rocks~~[lithologies](#).

### 4.1 Host rock characteristics

#### 4.1.1 Polymetamorphic Aar Massif basement rocks (ILZ ~~&~~ EZ)

The basement rocks of the ILZ and the EZ ~~consist of~~~~are present as~~ plagioclase, alkali feldspar and quartz dominated gneisses, which are occasionally enriched in micas (mainly biotite and white micas) and chlorite minerals (Fig. 3, second row). In the study area, the texture ranges from ~~typical coarse-grained~~~~plagioclase~~ granoblastic (the largest grain size of feldspars is < 2 cm) to ~~granodioritic fine-grained~~ [granoblastic](#) (grain sizes of <<1mm) for the matrix zones of the migmatites (Rutishauser, 1973). Usually the feldspars (both alkali feldspar and plagioclase), together with biotite, form large grains with interstitial quartz. This texture is only partially preserved, due to a later greenschist facies overprint.

This overprint is recorded by chlorite replacing biotite and quartz, sericitization of feldspar grains, as well as by the growth of interstitial white mica (~~see also~~ Berger et al., 2017b). The overprint, however, did not [completely](#) erase the original high temperature fabric ~~completely~~, instead it often forms core-rim structures around altered feldspar grains (Fig. 3: second row). Quartz aggregates still preserve the original texture. No new biotite growth occurred and no preferred orientation ~~(neither for quartz nor micas)~~ on the microscale is found. This aligns well with the lack of evidence ~~d~~ for an Alpine foliation on the outcrop scale in some basement rock outcrops outside discrete shear zones.

#### 4.1.2 Mesozoic [sedimentary cover](#) ~~sediments~~[rocks](#)

The Mesozoic ~~cover~~ ~~sediments~~[strata](#) form an originally up to 500m-thick succession of limestones, mudstones and sandstones (Fig. 4; for detailed discussion see Appendix A). The stratigraphic suite can be synthesized into eight larger units (Fig. 4 ~~&~~ Table 2). This allows to distinguish the main stratigraphic horizons, and to group units with similar mechanical strengths (see also Pfiffner, 1993; Sala et al., 2014). These units comprise: the Triassic (Mels-, Quarten- and [Roe](#)ti Fms.), the Mid Jurassic (Bommerstein- and Reischiben Fms.; “Dogger”), the Upper Jurassic A (Schilt Fm.) and B (Quinten Fm.), the Lower Cretaceous A ([Oe](#)hrli Fm.) and B (“Helvetic Kieselkalk” and Betlis Fm.), the “Siderolithic” and the Tertiary units.

There are several main characteristics needed to understand the structural fabrics within the individual sedimentary units. The basal Triassic, above the weathered basement-cover-contact, is formed by crystallized cellular dolomites and shales (Appendix Fig. A1). Despite varying thicknesses (5m- 50m) and ~~stratigraphic~~ ~~lithologic~~ ~~contents~~[characteristics](#), it is present throughout the entire study area. The 250m to 300m-thick suite of Upper-Jurassic limestones, and the overlying up to 150m-

thick succession of Lower Cretaceous limestones form the bulk of the strata and are constant in thickness throughout the studied area. The only difference between the facial domains (Fig. 4; aside from a thicker Lower and Mid Jurassic strata) is the presence of a Cretaceous B unit (in the northern flanks of Jungfrau and Eiger), which consists of layered cherts with limestone interbeds. Note that these features allow its identification as continuation of the Doldenhorn nappe farther to the west.

## 4.2 Deformation structures

The studied mountain chain is dissected by numerous high strain zones with variable orientations, which occur both in the basement and in the sedimentary cover. ~~Note that we refer to as shear zones for fabrics, which formed through ductile or semi-ductile deformation mechanisms. Only for brittle dominated structures (cataclasite and gouge dominated) we apply the term fault.~~

### 4.2.1 Basement strain localization

Locally, a weakly ~~pronounced~~ developed, pre-Alpine foliation can be found. If preserved, it is usually cut or overprinted by Alpine ~~exhumation related~~ structures. These latter structures generally occur as discrete sub-mm- to meter-thick shear zones in the field (Fig. 5a). They are present either as a set of generally steep or as a set of intermediate S dipping semi-brittle to brittle ~~faults forming on former shear zones~~ shear zones (Fig. 5). These steep ~~faults on reactivated~~ shear zones, which we define as SZ2 (Figs. 3 and 6; Note that SZ1 shear zones were only found in the ~~sediments~~ sedimentary rocks), exhibit normal and reverse ~~kinematics faulting behavior~~ with dominantly top to the NW shear senses, as is indicated by the offset of older structures (Figs. 5b,c) ~~and by dip-slip stretching lineation (Fig. 6a).~~ However, several individual faults show evidence for reverse movements as documented by displacements of isolated dm-sized blocks. Typical Riedel shears are present, highlighting the conjugate semi-brittle nature of the shear zones. The spacing between them decreases towards the NW and close to the JSW. In the Rottal (RT), the mean orientation of these structures is 315/84 (dip azimuth/dip) ~~with indications for up-movements of the southern blocks~~ with south block up movement. In the Trugberg (TB) zone the average dip azimuth is 180/52 (inferred from remote sensing). Note that owing to younger deformation overprint, the original orientation might have been different than at present.

The ~~An~~ intermediate steep set of shear zones (SZ3; Fig. 6) cuts and offsets the SZ2- structures. The ~~spacing of the shear zones is in the order of tens of meters~~ spacing is and therefore much wider ~~compared to the centimeter to meter~~ and scale of SZ2. In addition, the SZ3 ~~the~~ deformation ~~occurred is~~ more localized (especially within the JSW; Fig. 5). The orientation of the SZ3 suites also changes from moderately steep SE dipping to NW dipping in the NW (TB: 157/22 vs. RT: 351/27) with NW plunging stretching lineations (RT: 322/21). ~~The shear sense of SZ3 is characterized by top to NW thrusting (Figs. 6a, 8).~~

Despite the differences in orientation and kinematics, the microfabrics of both SZ2 and SZ3 samples show no difference in terms of deformation microstructures and mineral assemblages. Grains of the original pre-Alpine granoblastic fabric are either replaced by new grains of much smaller size (i.e. chlorite, white mica, epidote; Fig. 3; 3rd row), which are well-foliated, or they experienced mechanical grain size reduction down to a few micrometers. These small-grained minerals are often concentrated in micrometer- to centimeter-thick polymineralic bands. They form S-C fabrics and shear bands (Fig. 3). However, feldspar and quartz minerals are still present as porphyroclasts despite evidence for incipient dynamic bulging recrystallization for quartz (see also Bambauer et al., 2009). Notable is the higher phyllosilicate content in shear zone rocks compared to the host rock composition.

A youngest set of (i) SE-NW striking steep faults (F1) (ii) NW-SE running, sub-vertical fault planes (“ac joints” of Ustaszewski et al., 2007) and (ii) NW-SE oriented, sub-vertical fault planes (F2) (ii) SE-NW striking steep faults (Fig. 6c and Fig. 9b) that cut all older structures (Figs. 6c, 9b) and are characterized by brittle deformation forming cataclasites, fault breccias and gauges (Appendix Fig. A2). Both fault sets cross-cut all other structures and are best detected in the subsurface (along the “Jungfraubahnen” tunnel; Fig. 2), due to their susceptibility to weathering. Set F1 mainly features mm- to cm-wide fault zones along a set of open joints. However, the offset of these faults is in the order of a few centimeters to meters and is thus not resolvable at the scale of Figures 2 and 10. Set F2 shows oblique to strike-slip kinematics (Fig. S3) in cm to m wide cataclastic shear zones, often with fault gauges at the core. Set (ii) mainly features mm to cm wide shear zones along a set of open joints. However, the offset of these faults is in the order of a few centimeters to meters and is thus not resolvable in Figures 2 and 10.

#### 4.2.2 Deformation in the sedimentary cover sedimentsrocks

The cover sedimentssedimentary rocks show strong evidence for ductile deformation and brittle deformation, both on outcrop scale and in thin sections. Mapping reveals that the deformation fabric is dependent on the rheology of the hosting rocks. The calcite-dominated limestones exhibit a strong ductile overprint, expressed by complete dynamic recrystallization of the original fabric with grains that are smaller than 25 μm (Fig. 8). They show a well-developed foliation (S1) parallel to the bedding in most of the study area, which formed through abundant calcite dissolution and dynamic recrystallization. This first mylonitic foliationfabric (S1) shows a foliation spacing ranging from several cm in the lower RT (Rottal) section to <<1mm in the Moeönchsjoch (MJ). Typically, it overprints the bedding completely (Fig. 7). Notably the Triassic dolomite (Roeöti Fm.) was not deformed in a ductile, but rather in a brittle or semi-brittle manner. This is expressed in abundant bookshelf structures and “domino-like” boudins (Fig. 7c) affected by more than one deformation phase (Fig. 7e). These rigid lenses are stretched out along shear planes or form kink folds near the basement cover interface. The same applies to mid Jurassic iron-rich sandstones and Cenozoic iron-rich sandstones or iron-carbonate nodules (“Siderolithic”). This led deformation style leads to macroscopic (and microscopic)-scale boudins (Figs. 7 & 8), thereby making these units ideal stratigraphic markers to identify shear zones and stratigraphic polarity (Fig. 2).

In the NW flank of the Jungfrau-Eiger mountains, the Mesozoic ~~sediments-strata~~ are segmented in distinct stacks, separated by arrays of discrete shear zones (SZ1) of < 1 m to up to 5 m widths that are generally aligned parallel to the S1 foliation where the layer spacing decreases towards the shear zones that formed during the formation of S1. These shear zones acted as thrusts with a general top to NW displacement direction. They were accompanied by the circulation of metamorphic fluids, as testified by abundant iron-rich, micrometer-thick layers of precipitated minerals. Growth of white mica and chlorite minerals within the pressure shadows is frequently observed, mainly in non-calcite dominated lithologies. These thrusts contain slivers of ILZ basement rocks ~~in-of~~ the footwall, which are now incorporated in the sedimentary stacks (e.g. in the Rottal area, Figs. 2, 10).

Subsequent to the SZ1 thrusting, anti-clockwise rotation of the initial structures (bedding and S1, in section view, looking E) was accomplished by local folding near the basement cover contact. The folding produced SE dipping and SW/W to NE/E striking axial planes, which locally form an axial plane foliation (S2). This deformation affected the sedimentary rocks in an asymmetric way, where folding became more intense towards the SE, culminating in a dm-spaced axial plane foliation (S2) in the JSW (Fig. 7e), is documented by rotated sigma clasts in the shear zones (and the mineralized veins within them; Fig. 7). As a result, the present-day orientation of S1 varies from SE dipping (118/35 for region EN, 118/36 for region EW; see Figs. 2 and 9 for locality) in the lower para-autochthonous slice, to the NW dipping (312/22 for GG; 297/36 for EM; Fig. 9). ~~The original orientation is not preserved. This deformation stage affected sediments in an asymmetric way, and the folding is intensified towards the SE of the studied area. Consequently, these structures culminate in a weak dm spaced axial plane foliation (S2) in the JSW.~~

Subsequent NW-directed shearing led to a further thinning of favorably SE dipping or flat lying aligned thrust-planes of S1 fabrics in the now flat lying limbs of the stacked imbricates (Fig. 10**4b**). The new foliation (S3) formed often parallel (or only cutting under low angles) to the pre-existing mylonitic foliation (e.g. Figs. 7a,d). In cases where S1 structures dip ~~in~~ an unfavorably steeply to the NW orientation (e.g. as it is the case in RT region or at the location of Fig. 7b5), the local new foliation (S3) developed still under the same orientation, cutting the older foliation (S1) at high angles (Figs. 7b, 10). This foliation features evidence for slip where S1 fabrics are cut. Dip azimuth alters between gently SE dipping, flat lying and NW dipping, with a dominant top to NW sense of shear~~thrust~~, indicated by stretching lineation data derived from abundant calcite slickenside striations on S3 slip planes. This shearing occurred still under ductile conditions for calcite, ~~but~~ however non-limestone dominated lithologies, which includes (including incorporated basement slivers), exhibit shear localization merely by mechanical grain size reduction of minerals to a few microns. They form a microcrystalline cataclastic fabric consisting mainly of quartz, white mica, chlorite, epidote and feldspar.

The latest ~~deformation stage produced~~ a set of brittle sub-vertical faults striking NW-SE (F1) and steep SW- and NE striking oblique oriented brittle faults-zones with evidence for strike slip and reverse/normal fault behavior (FSZ24) and brittle sub-vertical faults striking NW-SE. Both are found within sediments-basement and cover rocks of all levels ~~like~~ (documented by fault breccia and mineralized veins crosscutting an older set; Appendix figure A2). These overprint all younger other

structures. Due to the brittle nature and connection to the surface they are often water saturated and highly susceptible to weathering. Despite cutting across all units, offsets (if even present) are limited to a few centimeters only and are thus not visible on map scale.

### 285 **4.3 Peak metamorphic temperature**

Raman spectroscopy applied to carbonaceous material (RSCM) was used on 8 selected samples representing the different tectonic levels in the studied area to constrain peak Alpine metamorphic temperatures for the sedimentary cover sediments (Table 3). Results yield the lowest temperatures for the presently lowest elevation sample (LAU-02: 283±14°C at 838 m a.s.l. for the Upper Jurassic limestone) and samples from the Eiger north flank (EN-01: 283±12°C at 2388 m a.s.l.). Slightly  
290 higher peak temperatures are obtained for samples collected at the Eiger summit (EG-17-01: 292±10°C at 3970 m a.s.l.). Highest temperatures are found in the JSW samples (MJ-03 and MJ-06: 308±14°C and 317±11°C respectively). The data indicate a trend to slightly higher temperatures towards the more internal units in the SE. Assuming we employ a constant average geothermal gradient of 2527°C km<sup>-1</sup> (Schlunegger and Willet, 1999; Glotzbach et al. (2010); Valla et al., 2016), falling in the global range for the upper continental crust (Pollack & Chapman, 1977) for the past (Pollack and Chapman, 1977).  
295 Thus, we are able to reconstruct the approximate minimum sample depth at peak metamorphic conditions. This allows us to identify the vertical position of the corresponding units relative to each other. The overall temperature range of 283°C to 317°C indicates a sample depth between 10.54 and 132 km, or even shallower, at peak temperature conditions. This further constrains the peak temperature for the crystalline substratum of these sediments-sedimentary rocks to <330°C.

### **4.4 Imbricate geometry in the sedimentary cover**

300 Stratigraphic markers (see Sect. 4.1.2) are used to delineate geometrical bodies-units separated by thrusts of different generations (see Sect. 4.2.2). From the-NW to the-SE (and present-day bottom to top) we find the ILZ and its sedimentary cover still in its original position. This is superimposed by two c. 500 thick imbricate stacks of c. 500m thickness, with normal stratigraphic succession within each stack (often referred to as “para-autochthonous”, Fig. 110). On top of these, we additionally find a >1000 m-thick pile of Cretaceous and Jurassic limestones, which was often referred to as  
305 the core of a syncline (Krayenbuhl &and Steck, 2009). These units are deformed as an ensemble during stage 2 and stage 3 phase of deformation as described in Sect. 4.2.2 (see Fig. 104). The subdivision of this sedimentary stack is internally consistent along strike within the study area. Lateral differences in structural style, which occurred in response to the last 2 deformation stages, are expressed by less shortening along the JSW (as shown in map view; see Fig. 2) -while more basement slabs were detached and thrust at a lower level. The ensemble of this deformation pattern resulted in a locally  
310 steeper (almost vertical) orientation of the basement cover contact. This is mainly due to the large differential block uplift in the basement (SZ2) that passively steepened the sedimentary cover in the SE. -

## 5 Discussion

The ~~cover sediment~~[sedimentary cover](#) reveals a set of distinct deformation fabrics that formed during a 3-stage evolution. We derive these stages from aforementioned field data and geometrical relationships. By disentangling the fabrics related to each stage, we can link these in a regional geodynamic context.

### 5.1 Pre-Alpine inheritance

An important role falls to Paleozoic and older structures that are inherited in the basement (i.e. the polymetamorphic basement called “Altkristallin” in the German literature; Steck, 1968). Since the ILZ and EZ were originally sedimentary protoliths (Rutishauser, 1973; Rutishauser, 1973a; Schaltegger, 1993) they feature a heterogeneous architecture (i.e. Abrecht, 1994). Large scale partial melting produced the original host rock fabric (Sect. 4.1.1). Radiometric dating yielded Ordovician ages for the [high temperature metamorphic overprint](#) of the ~~EZ~~[Rstfeld zone](#) ( $456 \pm 2$  Ma) and the ~~ILZ~~[Mertkirchner Lauterbrunnen migmatites](#) [migmatites](#) ( $452 \pm 5$  Ma; Schaltegger, 1993) ~~for this high temperature metamorphic overprint~~. Thus, any evidence of a previous geological history was erased, but the metasomatic overprint preserved to some extent the original heterogeneous lithological character (Berger et al., 2017ab, Abrecht, 1994). Subsequent tectonic events already aligned structures, [i.e. lithological boundaries and foliation \(Schaltegger et al., 2003\)](#), along a SW-NE direction, ~~i.e. lithological boundaries and foliation (Schaltegger et al., 2003)~~. The wedging ~~in~~ of Permian volcanoclastic sediments ([Berger et al., 2017b](#)), which was associated with folding, suggests that the basement internal nappe emplacement occurred ~~already~~ during the Carboniferous (Oberhänsli et al., 1988). The emplacement of several late to post-Variscan granitic intrusions completed the pre-Mesozoic evolution [of the pre-Alpine basement gneisses](#) and presumably lead to the greenschist facies overprint in the host rocks. The resulting heterogeneities were intermediate to steep S to SE dipping fabrics (Berger et al., 2017ab), which already formed before the initiation of the Alpine orogenic cycle and therefore represent important mechanical anisotropies for the ~~succeeding~~[Alpine](#) tectonic evolution (Herwegh et al., 2017).

### 5.2 Stratigraphic priming

Some of the steep SE orientated pre-Alpine heterogeneities were reactivated during the Mesozoic as normal faults within the Helvetic shelf of the Tethys Ocean (~~e.g.~~ [Hänni & Pfiffner, 2001](#)). Strikingly, in the study area, the JSW ~~sedimentary wedge~~ (that should later act as a major thrust) is located at the pre-Alpine boundary between the ILZ and EZ. The [favorable SE dipping](#) orientation most likely resulted in the re-activation [of these contacts](#) as Jurassic normal faults, causing the stratigraphic NW-SE asymmetry in the Mid-Jurassic (Herwegh and Pfiffner, 2005; Krayenbuhl ~~&~~ Steck, 2009). This allows [us](#) to account for the evolution across the former Helvetic shelf. Two important stratigraphic observations can be made in the Mesozoic of the Jungfrau tectonic sliver and associated shear zones: (i) The Triassic sequence is eroded to a deeper level towards paleo-~~SE~~, owed to the asymmetric Liassic erosion (“Alemannic land”: Pfiffner, 2014; Rohr, 1926) and (ii) the subsequent sedimentation in the Middle Jurassic is governed by normal faulting, resulting in thicker sediment

successions at deeper water conditions to the [paleo-SEW](#). Apart from these differences (and the difference in the Lower Cretaceous) the post-rift [sedimentary cover](#) ~~sediments are~~ rather similar in thickness and facies throughout the [studied study](#) area.

Generally, the autochthonous cover of the Aar Massif comprises a Mesozoic stratum resembling the northwestern-most facies of the Central Helvetic domain in the Lauterbrunnen valley (Bruderer, 1924; Masson et al., 1980; Herb, 1983). On a larger scale, our stratigraphic model aligns well with recent findings, [e.g.](#) for the Triassic (Gisler et al., 2007) and for the revised Tertiary stratigraphy of the Helvetic realm (Menkveld-Gfeller et al., 2016). This stratigraphic model (see Fig. 4 and [Table 2](#)) allows [us](#) to bracket ~~with the~~ thicknesses. We are aware of the partly large uncertainties on these values (sometimes up to 100%), yet it is still useful for [omitting-avoiding the reconstruction of](#) unrealistic geometries.

### 5.3 Structural imprint of the Alpine evolution

#### 5.3.1 Early stage deformation under highest Alpine temperature conditions

[Alpine Peak](#) metamorphic conditions are constrained by the RSCM estimates to low temperature (sub-greenschist facies) conditions for the [sedimentary cover](#) ~~sediments~~ and the immediate crystalline substratum. An upper [temperature](#) limit ~~for the calcite thermometry~~ is provided by the [graphite-RSCM](#) data from the most internal part of the JSW (Table 3) at ~320°C. Since the bulk of the Mesozoic strata consists of limestones (Fig. 2) the temperature range for the deformation has a lower constraint of ~~200~~[150](#)-250°C, which governs the onset of the ductile deformation of calcite (Herwegh et al., 2005, [Kennedy and White 2001](#), Burkhard 1993). These conditions align well with reported regional Alpine metamorphic gradients ([e.g.](#) Herwegh et. al., 2017; Niggli [&and](#) Niggli, 1965). Only at temperatures as high as ~300°C or above, onset of ductile deformation in quartz occurs, as can be inferred from the occurrence of dynamic recrystallization in form of bulging recrystallization (e.g., Stipp et al., 2002; Bambauer et al., 2009; Härtel and Herwegh, 2014). However, our quartz-rich basement rocks were mainly deformed in a semi-brittle manner (see Sect. 4.2.1) as [q](#)Quartz and [f](#)Feldspar are ~~in general~~[mostly](#) mechanically reduced in grain size within discrete shear zones (Fig. 3; last row). The mylonitic character is primarily owed to ductile behavior of micas, chlorites and the fine-grained polymineralic gauges ([similar to findings reported by](#) Wehrens et al., 2016; and Wehrens et al., 2017). ~~We see the onset of dynamic recrystallization in quartz through evidence for bulging in some samples. Thus, we must place the development of all shear zones in the basement close to or shortly after peak metamorphic conditions.~~

Contrariwise, the calcite limestone-dominated ~~cover~~[sedimentary rocks](#) ~~sediments~~ were completely recrystallized, along with the growth of new micas in pelitic rocks, leading to a pervasive, bedding-parallel foliation (S1). We find thrusts (SZ1) that synchronously utilized ~~theological~~ weak layers of the Triassic as detachment horizons and Tertiary shales and sandstones as roof thrusts. In case of the Triassic, the cellular dolomites, evaporites and shales (Fig 4) represent mechanically weak lithologies, where strain can be easily localized upon thrusting (Pffnner, 1993). Along these thrusts the [sedimentary cover](#) ~~sediments were~~[was](#) detached from their substratum and formed an imbricate stack (see Sect. 4.4, Fig. ~~1~~[2](#)a). Initially, this

375 occurred by reactivation of steep SE dipping Jurassic normal faults as reverse thrusts, which was a common mechanism for  
the inversion of the Helvetic shelf during the formation of the Alpine accretion wedge (Krayenbuhl & Steck, 2009; Hänni  
& Pfiffner, 2001). These thrusts incorporated decameter-sized slivers of basement rocks at the base of sediment stacks  
by the means of footwall shortcut thrusts (McClay, 1992). The shortening accumulated along each of the imbricate thrusts  
amounted to several kilometers (Fig 10).

380 This process most likely occurred during a final stage of the detachment of the Helvetic nappes farther to the SE and thus  
during the late Kiental phase of deformation (Burkhard, 1988; Herwegh & Pfiffner, 2005; Pfiffner, 2014). This scenario  
clearly contradicts the interpretation of Krayenbuhl & Steck (2007) who interpreted these structures as basement folds,  
since (i) we do not find signs for ductile folding in the basement rock, but rather the incorporation of large slices of basement  
rocks in the cover-sediments; and (ii) these sediments-sedimentary rocks are usually found in (thinned-out though) stacks  
385 within a normal stratigraphic succession. At the end of this deformation stage the cover sedimentary units were imbricated  
and stacked upon each other.

### 5.3.2 Exhumation structures

The early deformation phase did not leave a pervasive imprint in the basement rocks. However, a local basement-associated  
deformation is manifested by the incorporation of the early basement slivers in the sediment imbricate stack (see black  
390 arrows in Fig. 124a). This situation changed drastically during the next deformation stage. Here, the steep to sub-vertical  
SW-NE striking shear zones in the basement rocks developed (SZ2). They generally exhibit a reverse fault character with  
upward movement of the southern block (Figs. 3, 11b). Such structures can be seen through the whole Aar Massif  
(Baumberger et al., in press), and express the vertical extrusion of mid-crustal rocks during the “Handegg” phase (Herwegh  
et al., 2017; Wehrens et al., 2016; Wehrens et al., 2017). The large number and the dispersive distribution of these shear  
395 zones in combination with comparatively small offsets of a few centimeters to meters is characteristic and played an  
important role for the deformation in the sedimentary cover-sediments. There we find local small-scale folds (Fig. 7e) with a  
sub-vertical axial plane foliation (S2) in the JSW and just above the basement cover contact in the SE. The effect of the  
“Handegg” phase of vertical tectonics ended in the sedimentary cover units, where the localized shear-zones in the basement  
were accommodated by (deca)meter-scale folding in the mechanically weaker sediments-sedimentary rocks (Mid-Jurassic  
400 and Triassic; see Sect. 5.3.1-4) at their contacts with the basement rock. Therefore, this deformation phase did not affect the  
sedimentary nappe stack at higher tectonic levels by localized shear deformation (Fig.11b). At the scale of the entire massif,  
however, the large-scale bulging of both, the basement cover contact and the Helvetic nappe stack is in parts related to this  
deformation stage.

Subsequent horizontal thrusting overprinted all aforementioned structures, producing a set of thrusts that are found both in  
405 the basement and cover rocks (SZ3). These thrusts cut into the sediments-cover rocks, most notable in the JSW. They further  
induced the formation of the mylonitic S3 foliation in the sediments-sedimentary rocks, still under ductile deformation



conditions for calcite. This deformation corresponds to the “Pfaffenhopf” phase of Berger et al. (2017a) and Herwegh et al. (2017). It accommodated a significant amount (> 2km in the JSW; Fig. 11) of horizontal displacement, and the deformation was concentrated at several levels. During this phase numerous and large slabs of basement gneisses were wedged into the ~~sediments~~ sedimentary cover (see arrows in Fig. 12c). The presence of these has been known for almost a century (e.g. Scabell, 1926; Collet & Parejas, 1931; Kammer, 1989), yet their origin and particular position has never been considered as a key to understand the deformation style (Fig. 12c). ~~These slabs document a significant amount of shortening, which accommodated during the late “Pfaffenhopf” phase of thrusting.~~

### 5.3.3 Youngest structures

The brittle deformation structures presented in Sect. 4.2 cut all older ones and affect the crystalline basement and the sedimentary cover alike, thus being clearly the youngest ones to be active. The steep NE-SW shear zones ~~faults~~ (F1SZ4; Fig. 9b) do not accommodate much offset and rather are present often as open, or partly filled, joint sets. They are strikingly similar to structures reported by Labhart (1966). Berger et al. (2017a) described these structures in the same geodynamic context but referred them as “Gadmen” phase structures. The (sub)vertical SE-NW running planar features ~~faults~~ (F2) reported in Sect. 4.2.1 show a complex history of deformation, with clear evidence for brittle deformation (cataclasites of several generations and young fault gauges in the cores). Offsets at cm to meter scales allow us to identify strike-slip to oblique fault behaviour. They have striking similarities with faults reported from the SW Aar Massif. According to Ustaszewski et al. (2007) these offsets record evidence for “episodic” cycles of brittle deformation and fluid pulses that formed the veins and cataclasites over millions of years. In addition, these faults were considered to offset Quaternary sequences (Ustaszewski et al., 2007) as well. However, both fault sets affect the crystalline basement and the sedimentary cover alike and do not feature large offsets. They are thus not considered as great importance for the structural style and the inferred deformation history.

### 5.4 Geodynamic implications

The deformation structures described in this work give high resolution insight in the processes that resulted in the exhumation of the ECM to its peculiar position at the Alpine front. First, the peak temperature estimations for the internal JSW (<330°C) indicate a depth of 10.54-132 km during these conditions (assuming a geothermal gradient of 27 °C km<sup>-1</sup>). The onset of dynamic recrystallization in quartz in these rocks indicates that the first deformation occurred close to ~~these~~ peak metamorphic conditions. This deformation produced the fabrics (SZ1, S1), which we link with the imbrication and the stacking of the ~~sediments~~ sedimentary strata. ~~These processes were~~ ~~which was~~ also associated with the wedging of some basement rock lenses. Hence, ~~t~~ this deformation marked the change from thin-skinned tectonics to thick-skinned deformation between 30 and >22 Ma (late “Kiental” phase of Burkhard, 1988) at the external European continental margin. It records the

latest stage of shearing off of sedimentary nappes within the Alpine edifice (Schmid et al., 1996, Handy et al., 2010) and is characterized ~~dominated~~ by horizontal shortening with a minor vertical component ~~and horizontal tectonics~~.

440 The following drastic change in tectonic style to vertical differential uplift through reverse/normal faulting produced mainly shear zones in the basement (SZ2) with only local folding in the ~~sediments~~ sedimentary cover (~~with~~ axial plane foliation S2). These structures have been related to the “Handegg” phase of deformation (active between 22 and >12 ma), because of their striking similarity with structures in the Haslital and ~~can be found~~ in the entire Aar ~~massif~~ massif (ei.ge. Wehrens et al., 2016; Wehrens et al., 2017; Herwegh et al., 2017, Berger et al., 2017a). They accumulate vertical displacement up to 8 km in the southern Aar Massif (Herwegh et al., 2017, Wehrens et al., 2017, Wehrens et al., 2016) while little offset was  
445 accumulated ~~It is noteworthy that at~~ in the NW rim of the Aar massif (our study area), ~~little offset was accumulated~~. The sudden change from horizontal to vertical dominated tectonics ~~was is thought to be~~ induced by buoyancy forces and slab steepening (Herwegh et al., 2017) on a larger scale and ~~was therefore~~ related to the rollback subduction of the European lithospheric mantle slab and slab steepening (Schlunegger ~~&and~~ Kissling, 2015; Kissling and Schlunegger, 2018).

Another change in tectonic style (back again to horizontal tectonics) produced the third, more localized deformation fabric  
450 (SZ3, S3). This NW directed thrusting ~~occurred during~~ cuts and partially overprints older structures, which resembles the “Pfaffenchofpf” phase ~~and is an expression of the remaining compressional orogenic forces~~ (Wehrens et al., 2017; Herwegh et al., 2017). It is during this phase that a second set of large basement rock slabs ~~is was~~ thrust into the sedimentary cover. The localized thrust horizons, where ~~One~~ major thrust horizon ~~is~~ located within our JSW, contributed significantly to the uplift during the exhumation. ~~offsetting the EZ for at least 2 km.~~

## 455 6 Conclusions

~~We find that linking~~ The linkage between the deformation structures in the Aar Massif basement and its sedimentary cover at the Aar Massif NW rim ~~is aggravated~~ allows us to present a detailed picture of how bedrock with different lithologies responded to identical mechanisms under greenschist metamorphic conditions, and lower by (i) the different rheological response to strain under the presented T conditions and (ii) the superposition of several deformation structures. In this  
460 context, we ~~first~~ find that the key for a better understanding of the tectonic complexities lies in the finding ~~that of~~  $T_{max} < 330^{\circ}\text{C}$ . It ~~allows only for brittle deformation of feldspar, dolomite or iron-carbonates, very limited semi-ductile deformation of quartz, and entirely ductile deformation of calcite and phyllosilicates.~~ is key. This leads to ductile folding and thrusting in the calcite-dominated cover ~~sediments~~ rocks (ei.ge. Upper Jurassic, Cretaceous) while in the quartz- and feldspar-dominated basement (i.e. the ILZ, EZ) semi-ductile ~~and discrete~~ shear zones were formed ~~whereas despite~~ the bulk of the crystalline  
465 basement rocks ~~behaved reacts~~ in a brittle manner to the same deformation. ~~Secondly~~ Based on this, we can disentangle the imprints of at least 3 deformation stages, each leaving different structures in the crystalline basement and the sedimentary cover. This enables us to refine the original 2 phase-subdivision (Kiental- and Grindelwald-phase) and allows us to link our

470 observations with the recently published large scale block extrusion model of the entire Aar Massif, governed by the change in plate driving forces in the lithospheric mantle. Lastly, we conclude that the [multiphase multiphase tectonics deformation oriented the basement-cover contact of the Aar Massif in a steep NW plunging manner. The structural imprint deformation structures in combination with the uplift](#) (especially the horizontal and vertical shear zones and foliations) set up the stage for [preferential](#) erosion to produce the impressive morphology of the Eiger-Jungfrau mountains.

### **Data availability**

475 Remote sensing derived lineaments used for Fig. 6a are provided as .xyz files with Swiss coordinates (CH1903) [are and](#) included in the supplement (S1).

All measured Raman spectra with intensity (in arbitrary units, second column) over Raman shift (in cm<sup>-1</sup>, first column) and Used spectra for curve fitting (and Fig. S3 histograms) are indicated in the excel sheet, all in the supplement (S2).

### **Author Contribution**

480 DM and FS designed the study whereas DM and AL carried out fieldwork and LN did the RSCM measurements. DM interpreted the data with additional scientific input from MH. DM prepared the manuscript and figures with contributions from all co-authors.

### **Acknowledgments**

485 We thank the “Jungfraubahnen” Railway Company, especially Stefan Michel, for their logistic support and access to the railway tunnel. We further thank the High Altitude Research Stations Jungfrauoch and Gornergrat (HFSJG) for making our fieldwork possible. [We thank Midland Valley \(now Petex\) for providing an academic version of Move™, licensed to the Institute for Geological Sciences of the University of Bern.](#) The research was supported by the Swiss National Science Foundation through grant No 159299 awarded to Fritz Schlunegger. Alfons Berger is thanked for discussion about basement rock units. [We thank Franz Neubauer and an anonymous referee for insightful comments that improved the manuscript.](#)

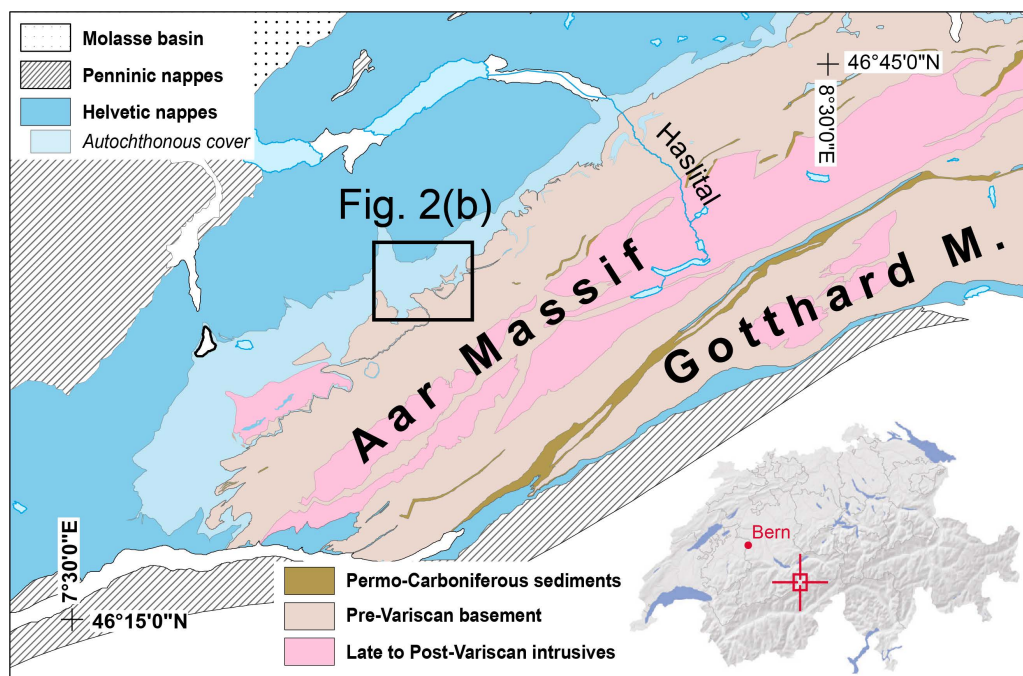

Figure 1. Regional tectonic overview map (modified from Pfiffner et al., 2011) with location of the study area within the Swiss Alps (insert).

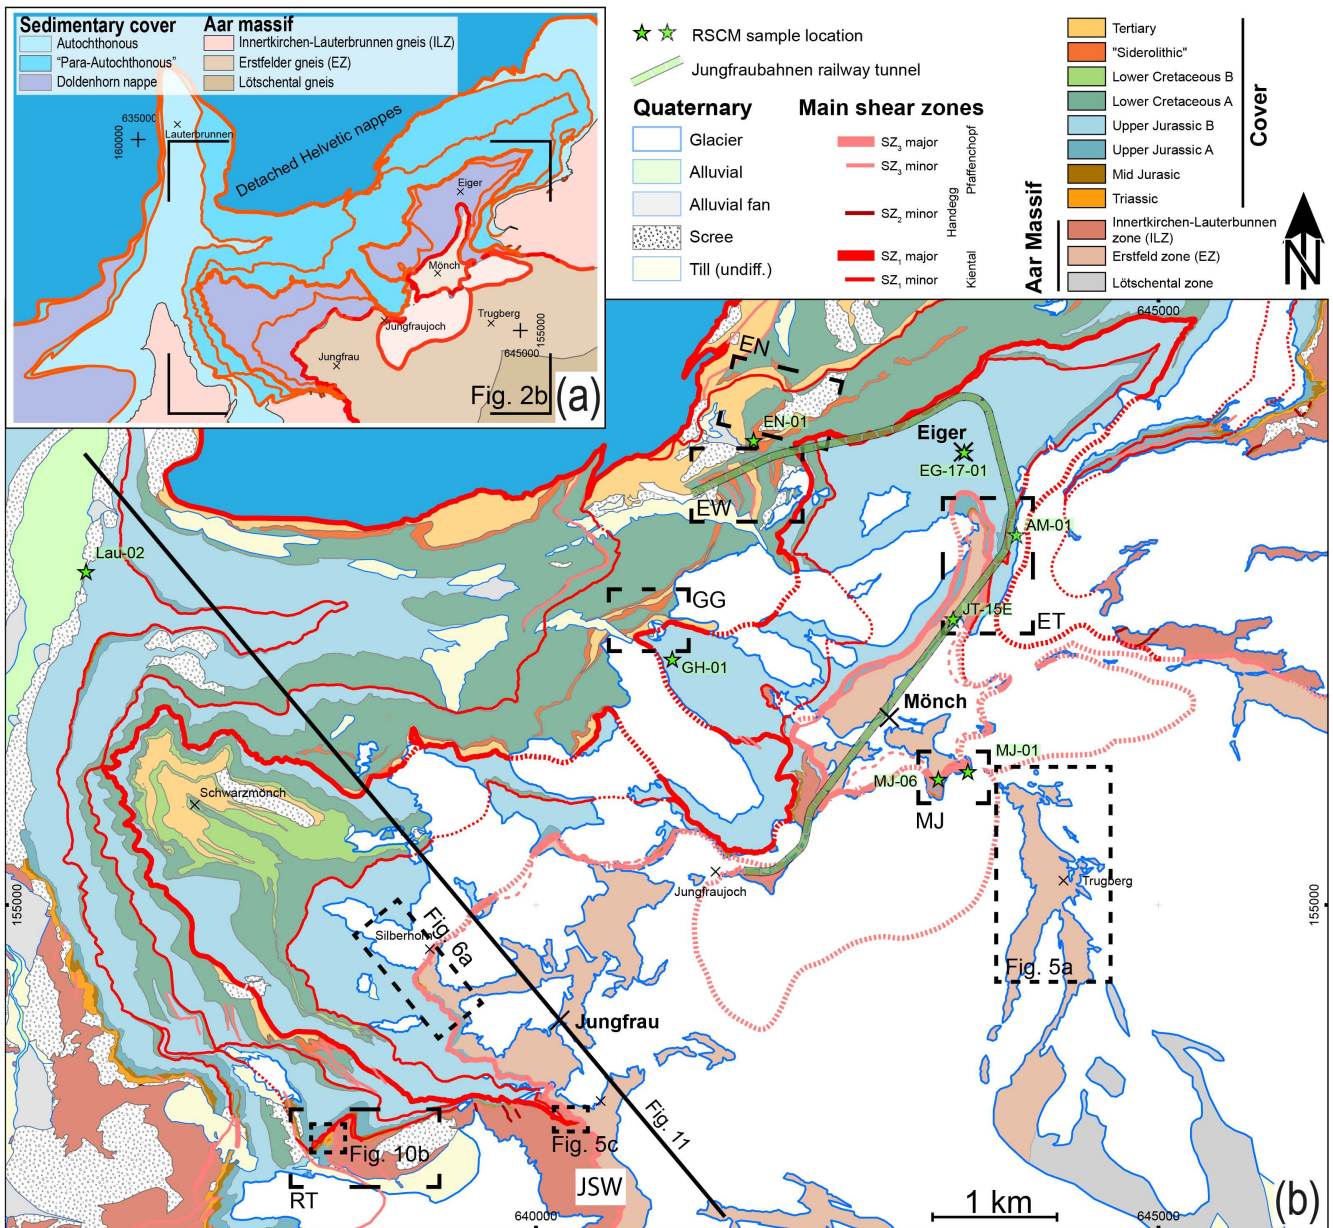

495 **Figure 2.** Structural main shear zone map based on own field work and compiled from sources as discussed in Appendix A. (a) Tectonic overview of the studied zone. (b) Refined structural and lithological map. Profile trace for Fig. 11 and key locations (EN... Eiger north, ET... Eismeer/Tunnel, EW...Eiger west, MJ... Moenchsjoch, RT... Rottal, TB... Trugberg; JSW... Jungfrau sediment wedge) are indicated. RSCM sample locations are indicated (subsurface samples from the railway tunnel are indicated with dashed stars). Coordinates are given in Swiss Coordinates (CH1903).

## Innertkirchen-Lauterbrunnen zone (ILZ)

## Ertsfeld zone (EZ)

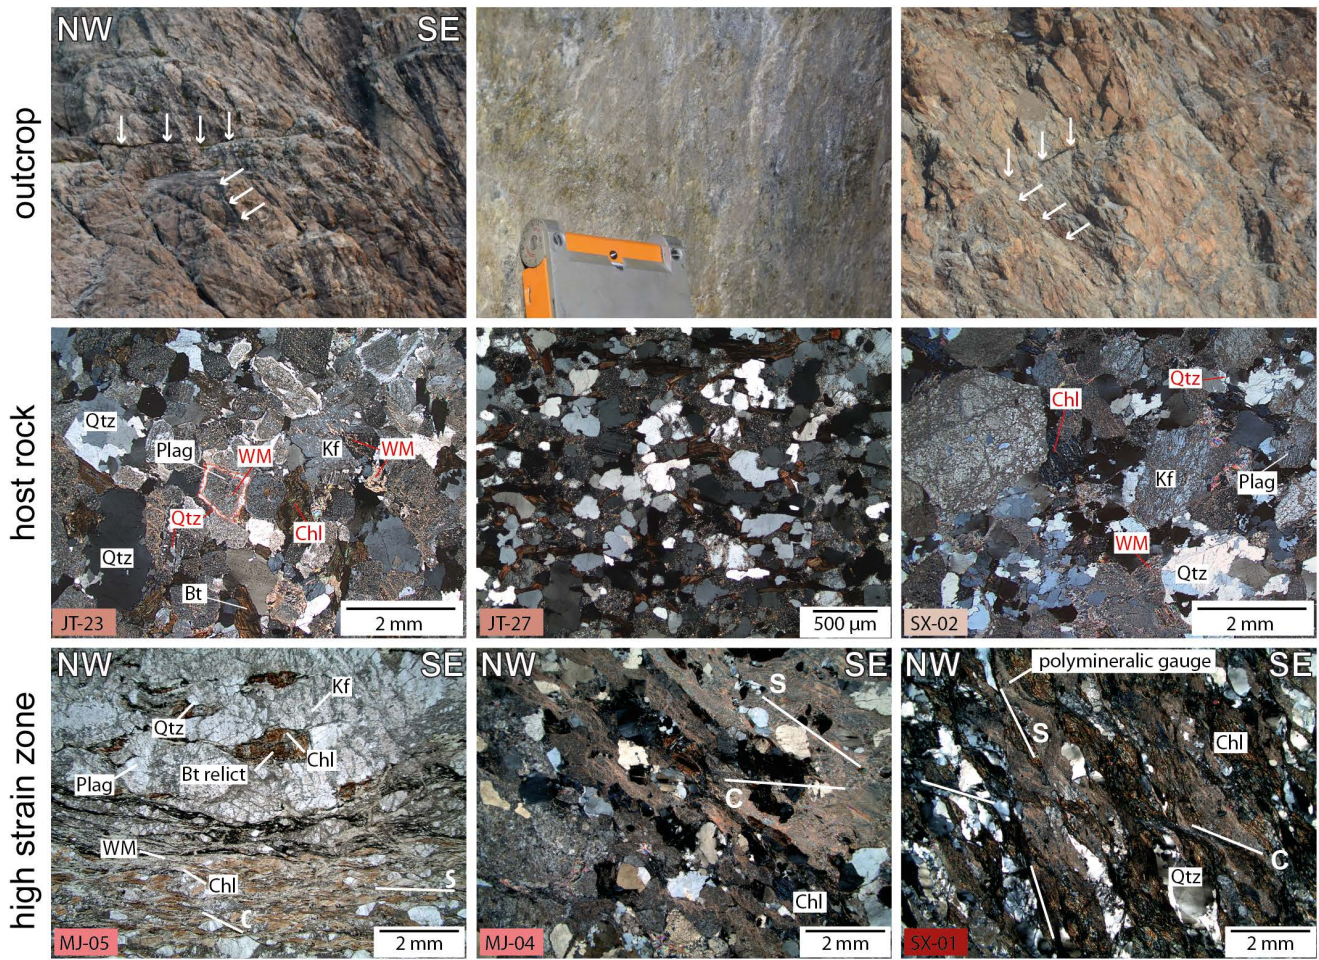

Figure 3. Key basement rock fabrics. Row 1: Outcrop images with indication of discrete shear zones (white arrows). Row 2: Crossed polarized light micrographs of pre-Alpine fabrics with relictic granoblastic microstructures of large feldspar and biotite crystals, and interstitial quartz. Metamorphic overprint manifests in: i) white mica and quartz growth with smaller grain sizes, ii) the alteration rims of feldspar and iii) biotite to chlorite alteration (minerals from overprint are marked in red). Note the highlighted core-rim structure stemming from feldspar sericitization. Row 3: Shear zone micrographs. SC – fabrics are formed by white mica, chlorite and polymineralic fine-grained ultracataclasite or ultramyylonite in between porphyroclasts, (which exhibit brittle deformation). Mineral abbreviations: Bt-biotite, Chl-chlorite, Kf-alkali feldspar, Plag-plagioclase, Qtz-quartz, WM-white mica. Sample names are indicated; for sample details see Appendix table A1.

NW

Transitional facies to Doldenhorn basin ▶

Autochthonous sediment cover of the NW Aar massif ▼

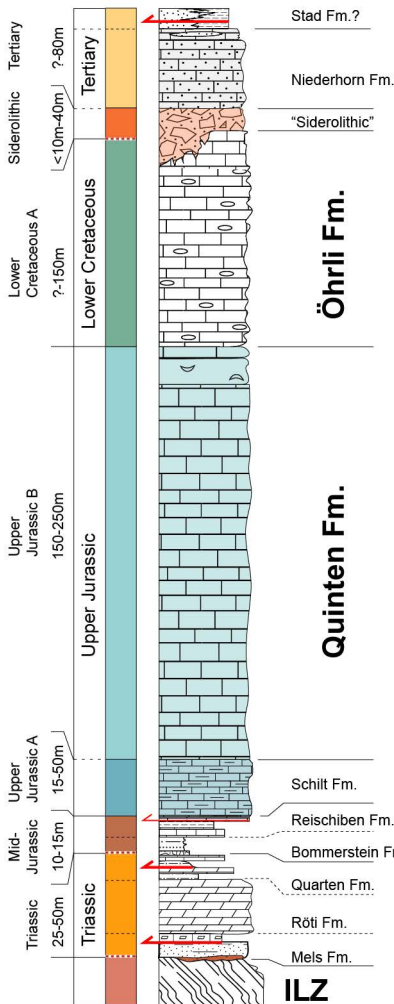

ILZ

SE

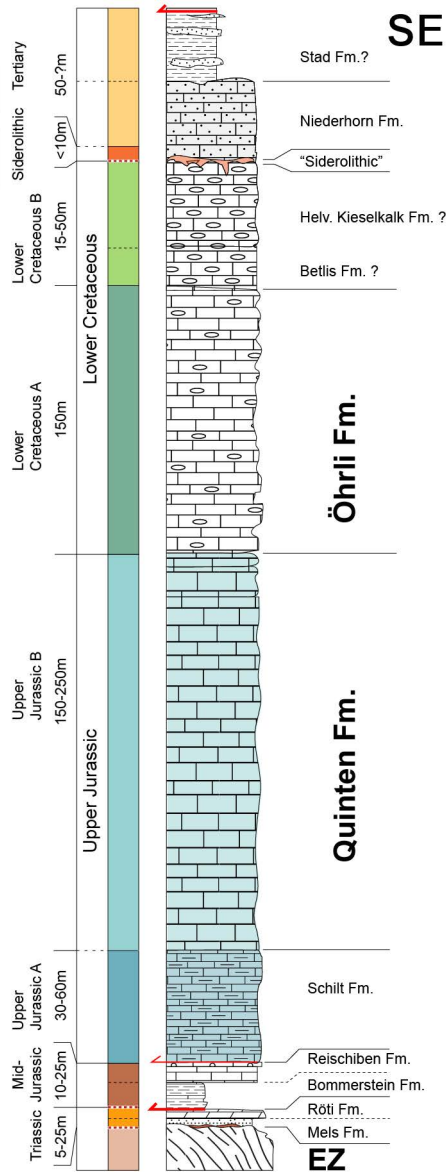

EZ

510 Figure 4. Detailed stratigraphic profiles for the Mesozoic cover-sedimentary cover sediments (for sedimentological discussion see Table 2 and Appendix A). Future main detachment horizons are marked (red arrows), ILZ ... Innertkirchen-Lauterbrunnen Zone, EZ ... Erstfelder Zone. For references for the thickness estimates and individual unit names see table 2. This figure serves as legend for Fig. 110.

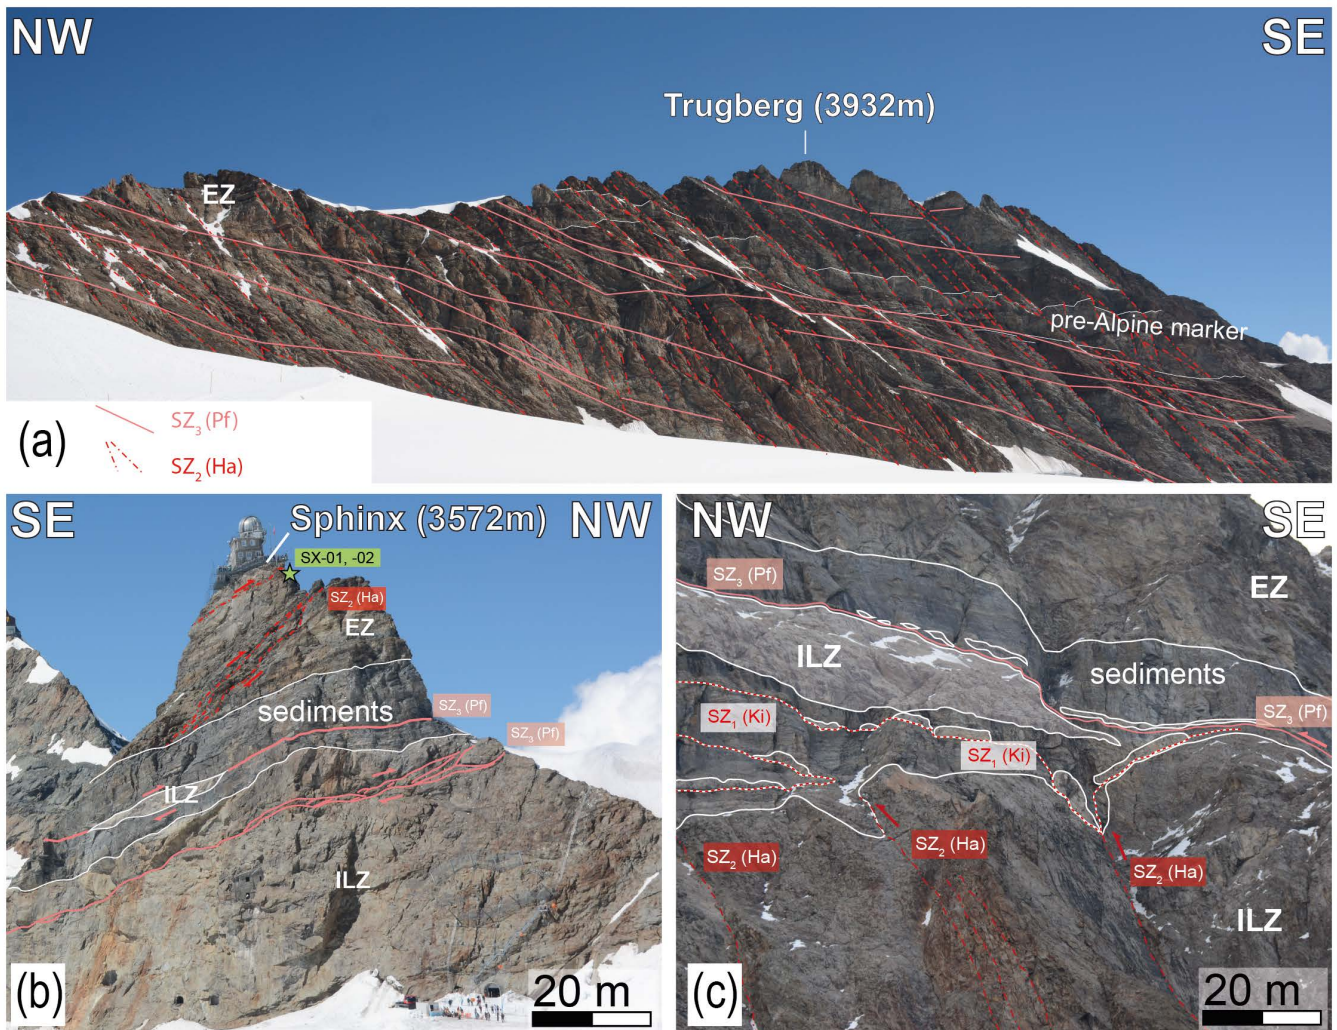

515 Figure 5. Deformation structures in the basement on the large scale in different key outcrops along the strike of the mountain  
 chain (localities are indicated in Fig. 2). (a) Trugberg mountain ridge viewed from the west: The complex shear zone network with  
 indication of the individual deformation phase structures Pf: Pfaffenchoepf phase, Ha: Handegg phase (see also Fig. 6). (b) The  
 Jungfrau sediment wedge (JSW) from the east with an incorporated large basement wedge that separates the Innertkirchen-  
 Lauterbrunnen zone (ILZ) from the Erstfeldzone (EZ). (c) Late stage shear zoning below the Jungfrau demonstrating the complex  
 520 cross-cutting and overprinting relationship of the different structures (Ki: Kiental phase). For deformation phase discussion and  
 attribution see discussion in text. Location of key samples is indicated (SX-01, SX-02).



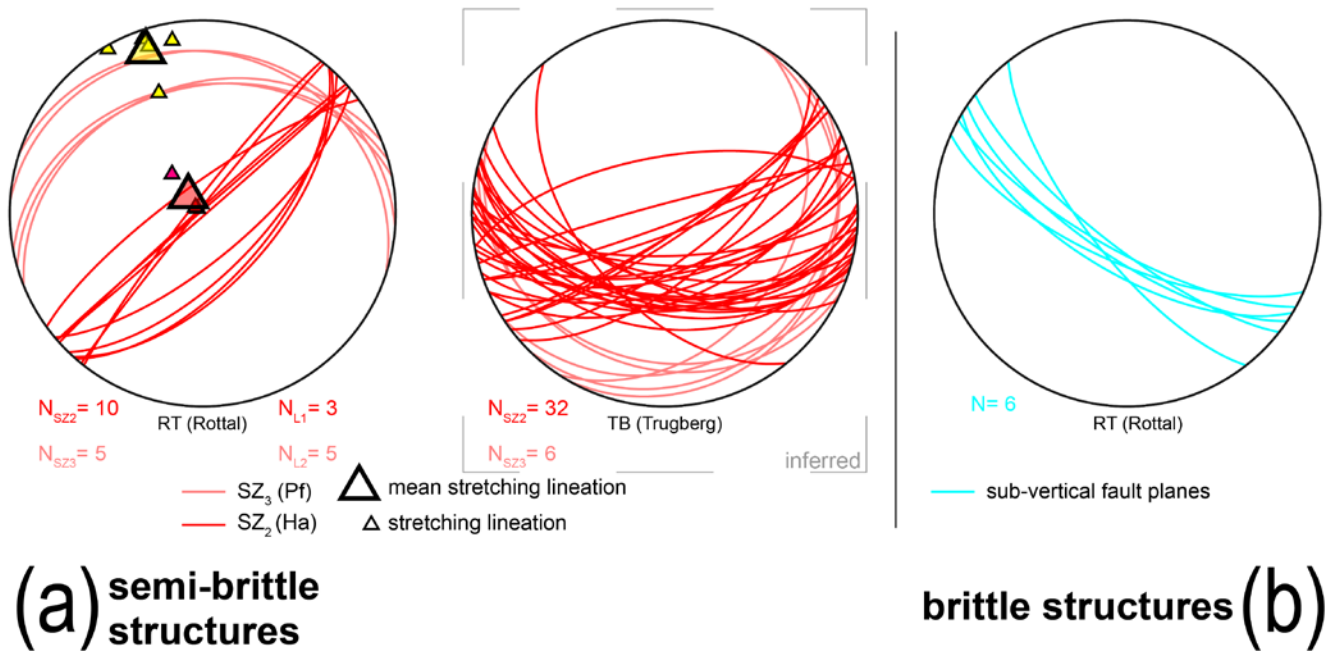

525 **Figure 6. Structural field data for the basement from the Rottal (RT). (a) Shear zones related to main phases of exhumation. Shear zone orientations for TB were inferred from by plane fitting through moment of inertia of remote sensed lineaments (data provided in the supplement S1). (b) Vertical lineaments that crosscut structures from (a). For geographical abbreviations and shear zone legend see Fig. 2.**

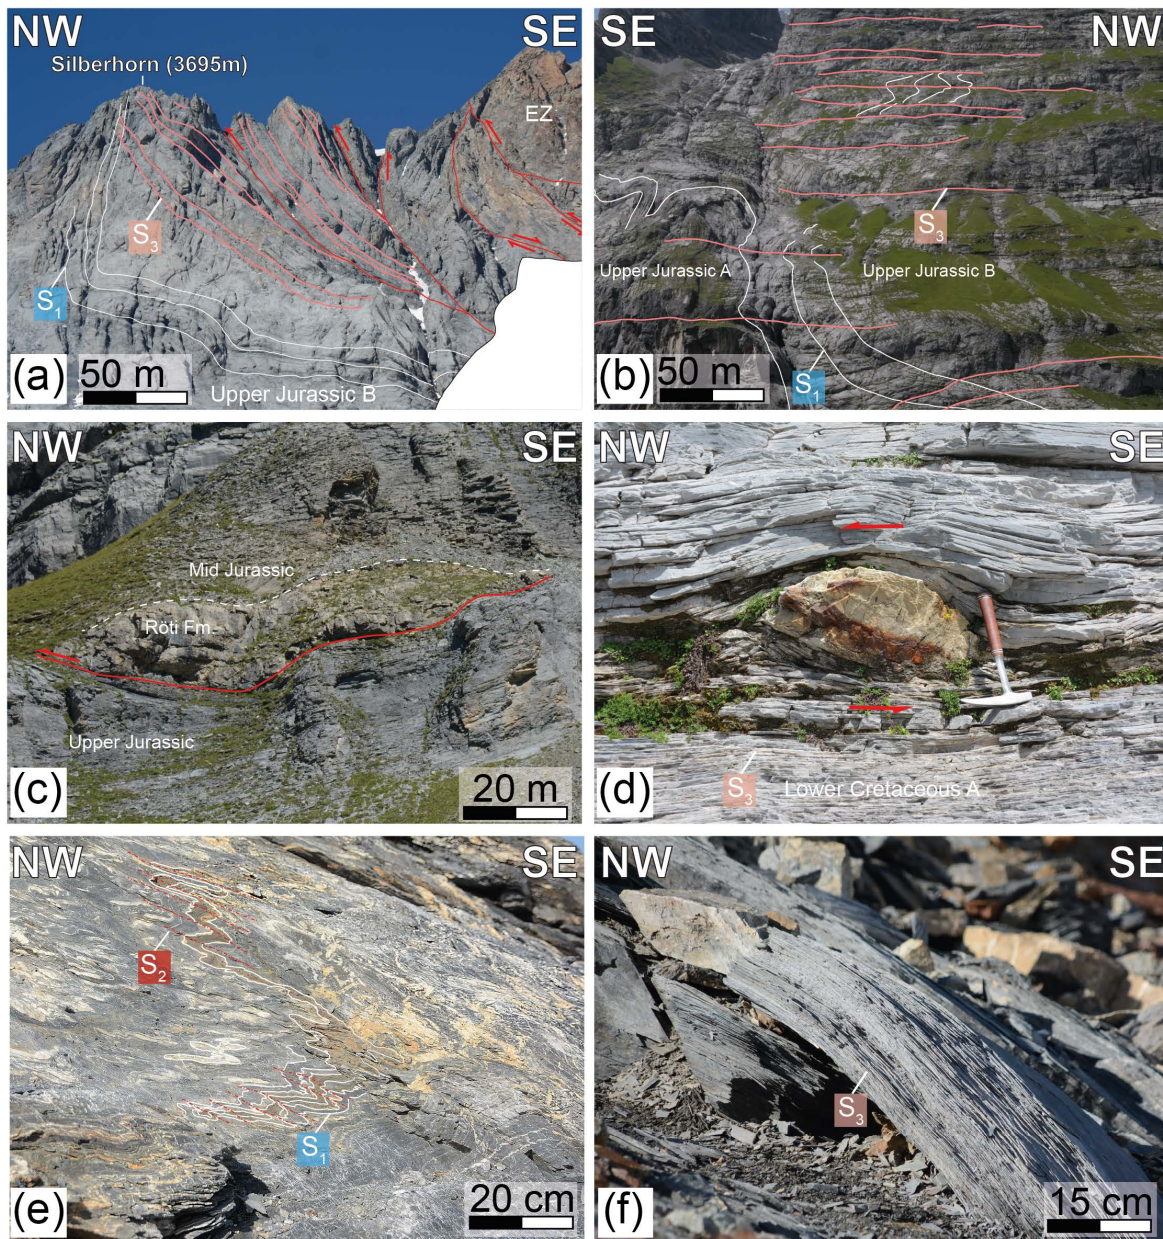

Figure 7. Field examples of key deformation structures within the [sediments/sedimentary rocks](#). (a) Modulation of the previous foliation (S1, white lines) by the latest stage fault system (solid red lines) and the contemporarily induced foliation (S3, pink lines) in the summit region of the Jungfrau. (b) Similar overprinting of already folded bedding by the younger foliation east of the Eiger summit in a lower level (elevation around 2500m a.s.l). (c) Decameter size dolomite boudin of the Triassic (Rötli Fm.) marking the shear zone at its base in the RT (Rottal) region, which is the roof thrust of the autochthonous cover unit. (d) Decameter sized sigma clasts of boudinaged iron-rich nodules (“Siderolithic” Fm.) within the ductile host rock mylonites that marks a shear zone in the west flank of the Eiger Mountain. (e) Local modulation of the initial foliation and folds by steep SE plunging axial planes with foliation, inflicted during the intermediate step of deformation (Ha). (f) Carbonaceous ultramylonite in the MJ transect, some

decameter above the location of (e), showing the strongly localized latest overprint, completely ~~removing-transposing~~ traces of previous deformation.

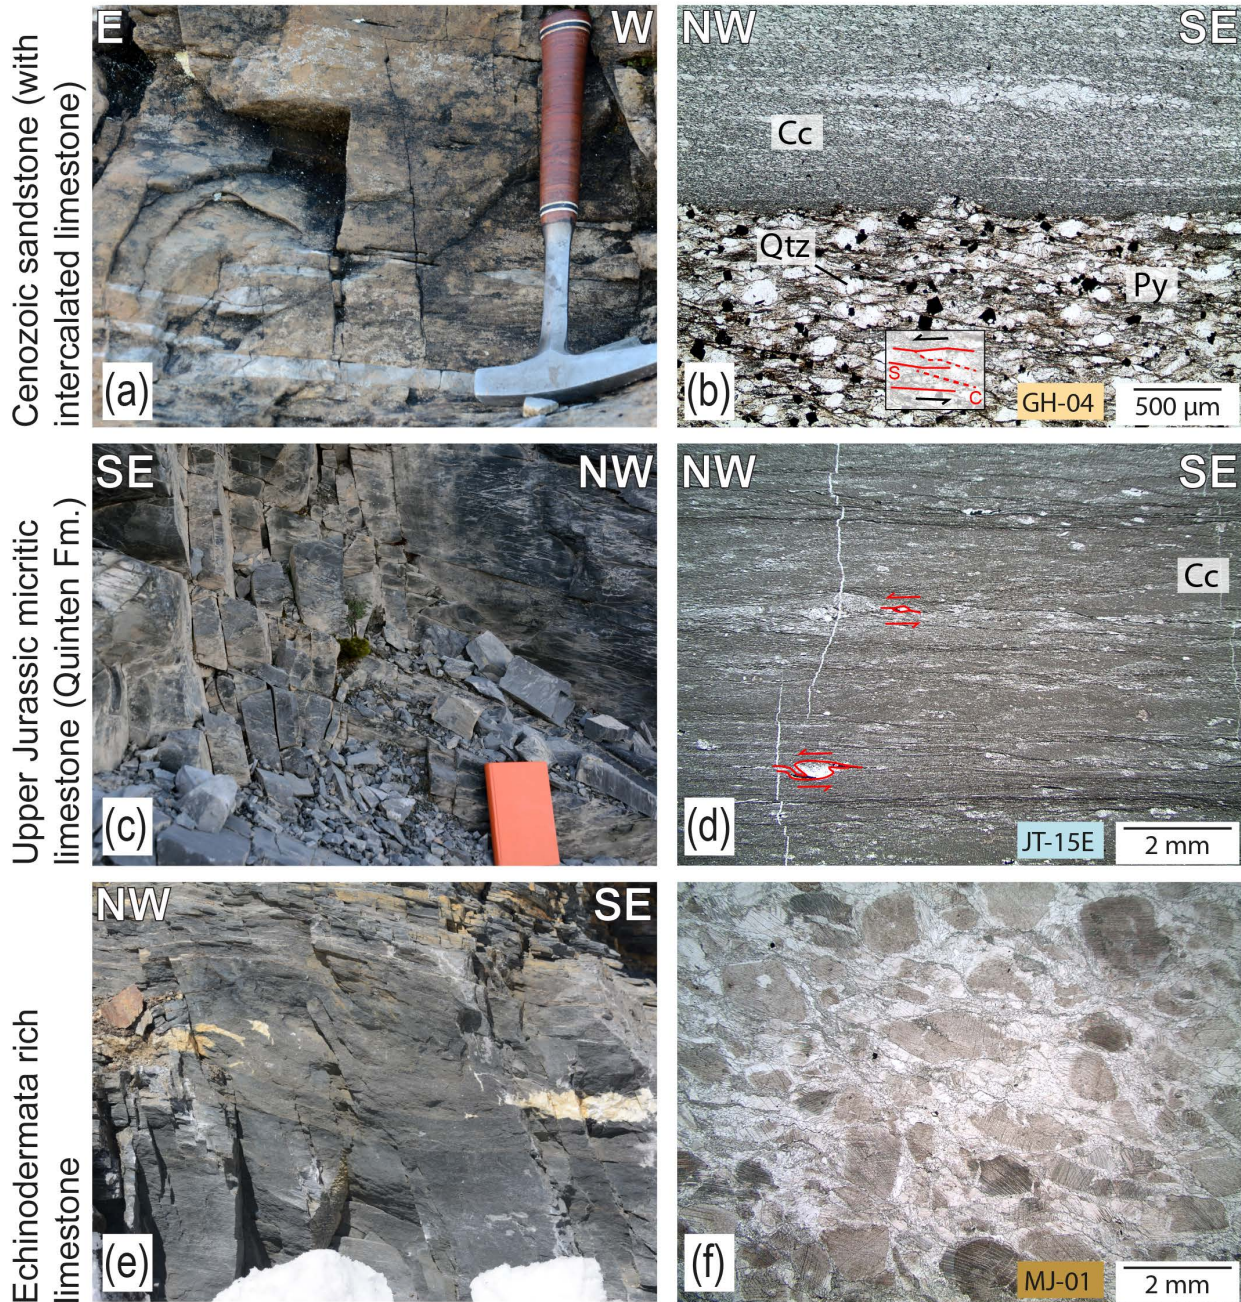

Figure 8. Deformation structures on outcrop and microscale. (a) Ultra-mylonitic Tertiary sandstones intercalated with calcite limestones that (b) show a dynamically recrystallized fabric in the limestone part, while the quartz within the S-C mylonite exhibits still (semi) brittle behavior. This manifests in mylonitic ductile shear bands formed by micas and calcite while quartz grains (along with ~~p~~Pyrite) form sigmoidal clasts. (c) Dark ~~and~~micritic limestone mylonites of the Upper Jurassic B unit with a

(d) completely recrystallized fabric of microcrystalline calcite. (e) Echinodermata-rich limestone of the Mid Jurassic show the low P, T overprint with (f) un-deformed echinodermatas, probably due to consisting of Mg- calcite and thus being stronger (Xu et al., 2009). Mineral abbreviations: Cc-calcite, Qtz-quartz, Pv-pyrite.

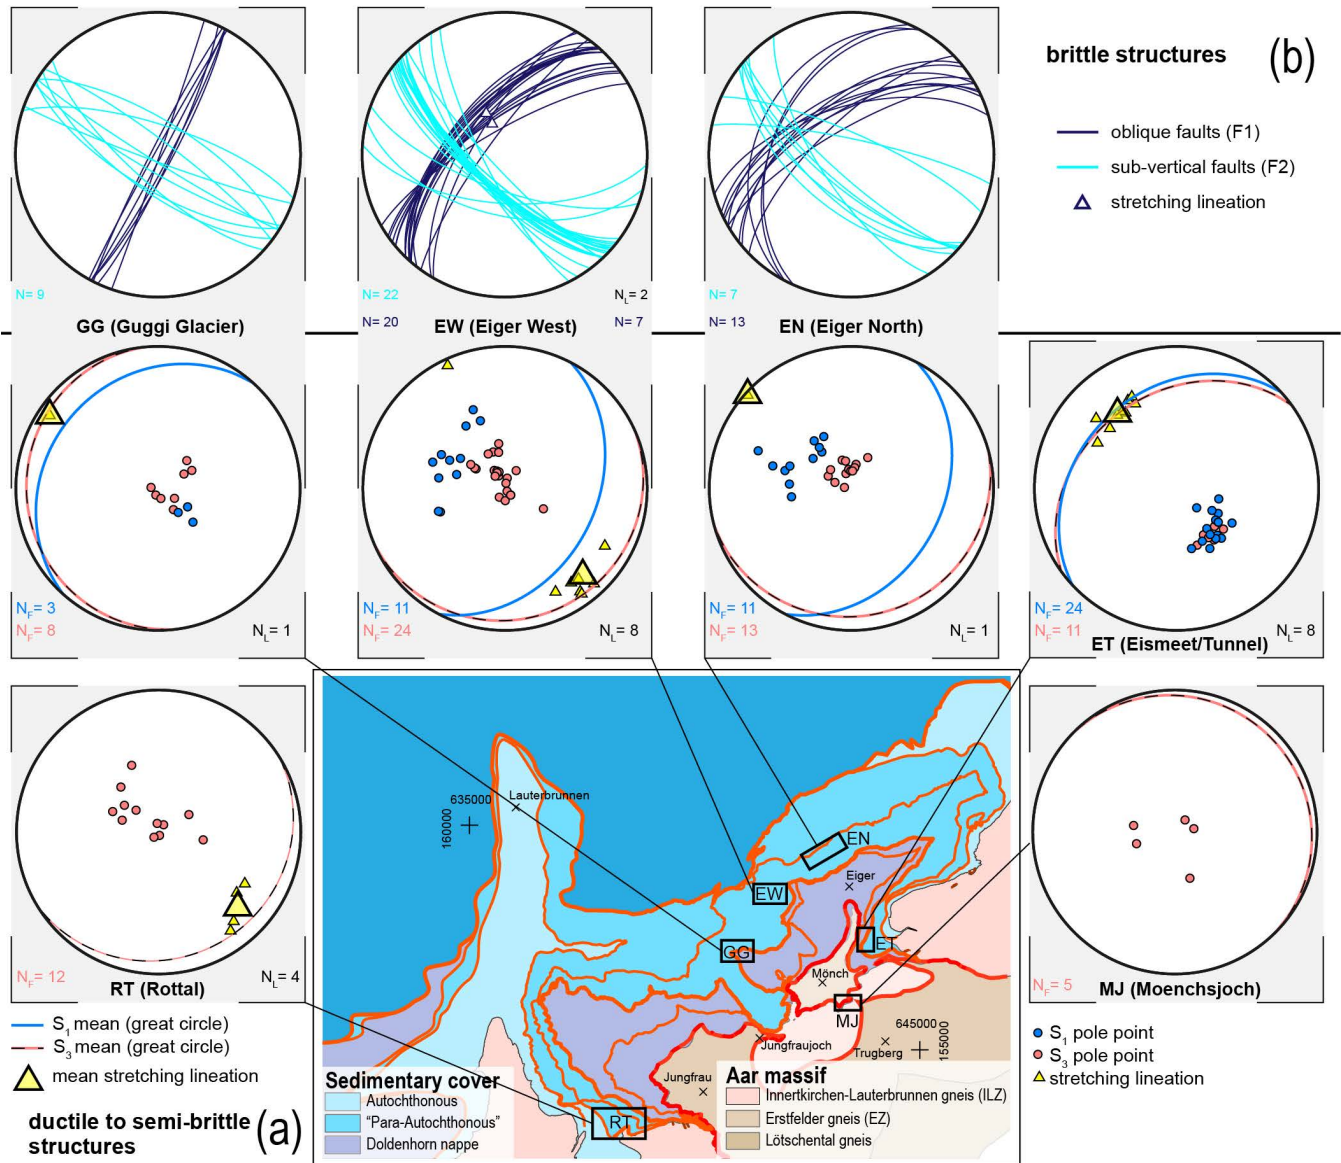

Figure 9. Deformation structures in the sediments. (a) Bedding parallel  $S_1$  foliation and later induced  $S_{23}$  foliation that consists of numerous slip surfaces. Stretching lineation are only documented on  $S_{23}$  surfaces. (b) Brittle-only structures that crosscut structures in (a).

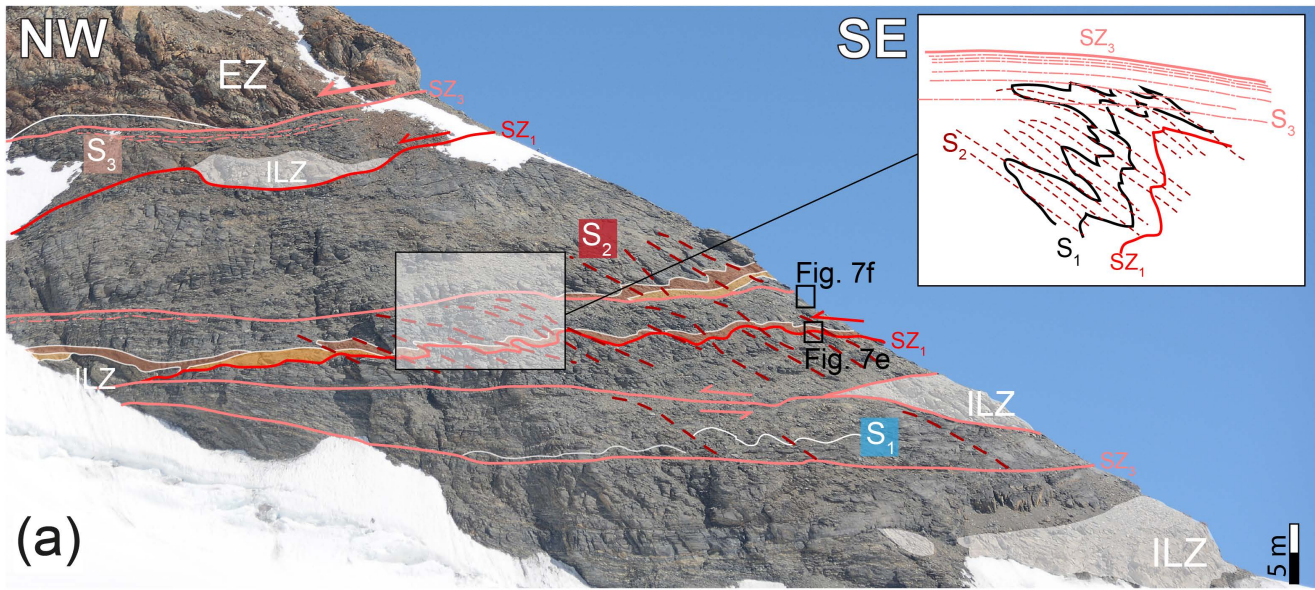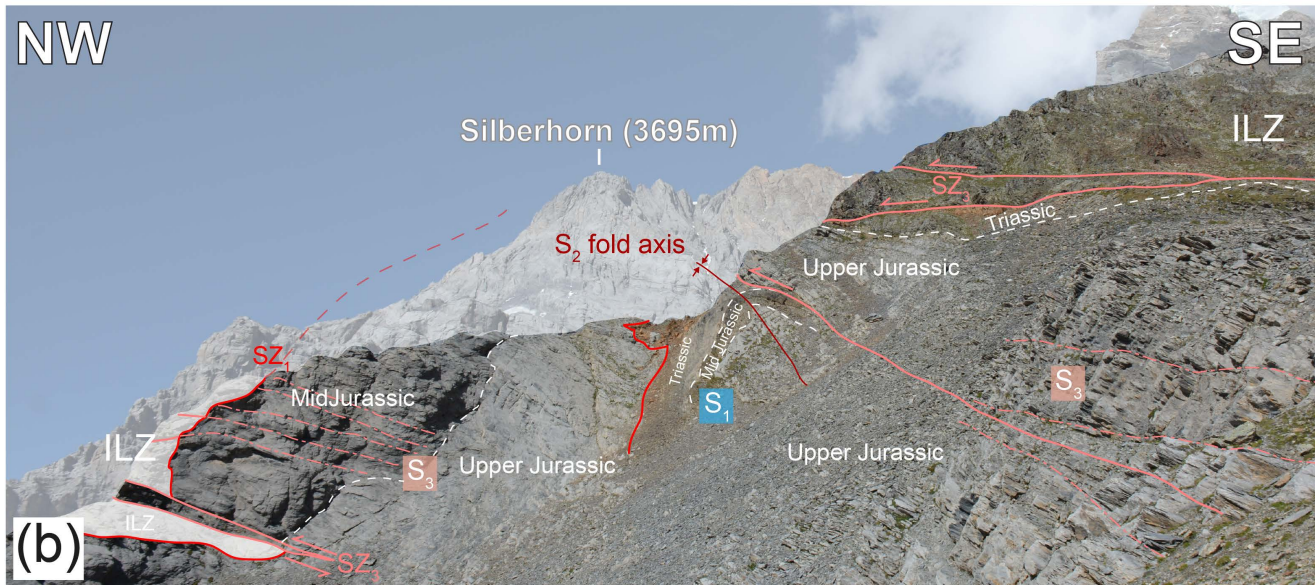

**Figure 10. Cross-cutting and overprinting relations between the structures close to the basement cover contact for key locations. (a) Sediments in the Jungfrau sediment wedge (JSW), at the Moenchsjoch locality (M.J.; see Figs. 2.9), between the Erstfelder gneiss zone (EZ) and the Innertkirchen-Lauterbrunnen zone (ILZ) illustrating the crosscutting and overprinting (see also insert). Note that some sediment markers are highlighted (brown: Mid-Jurassic, orange: Triassic). (b) Similar structures at the Rottal (RT; see Figs. 2.9) location, where the late thrusting of the ILZ basement caused deflection and rotation of the S2 folds and cross-cutting and passive rotation of the SZ1 thrusts. Note the penetrative S3 foliation.**

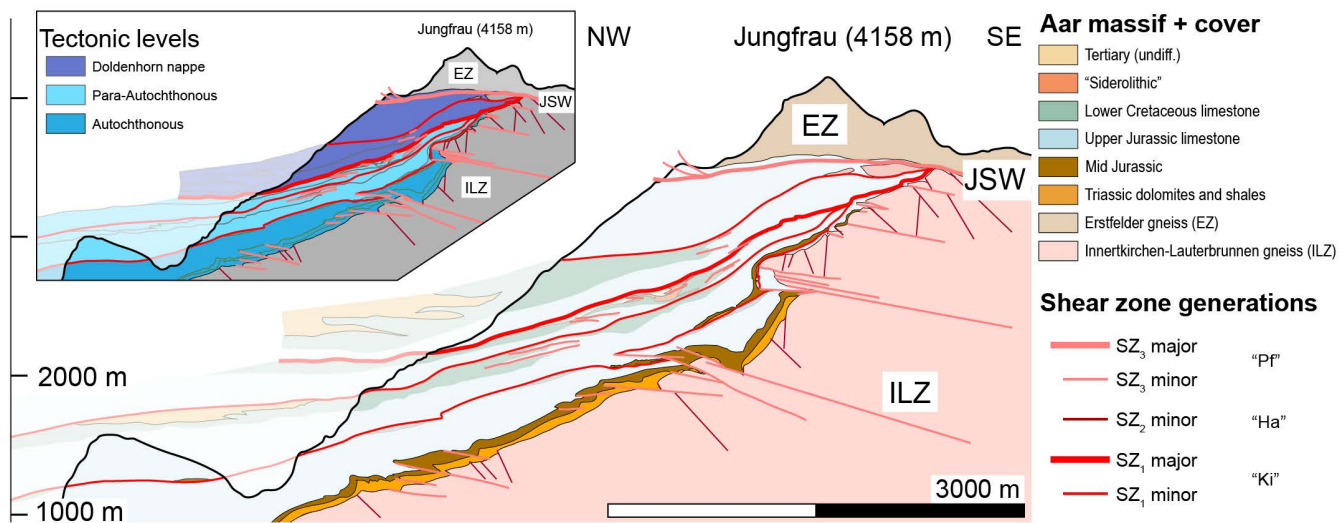

Figure 110. Simplified structural profile across the NW rim of the Aar Massif (profile trace indicated in Fig. 2).

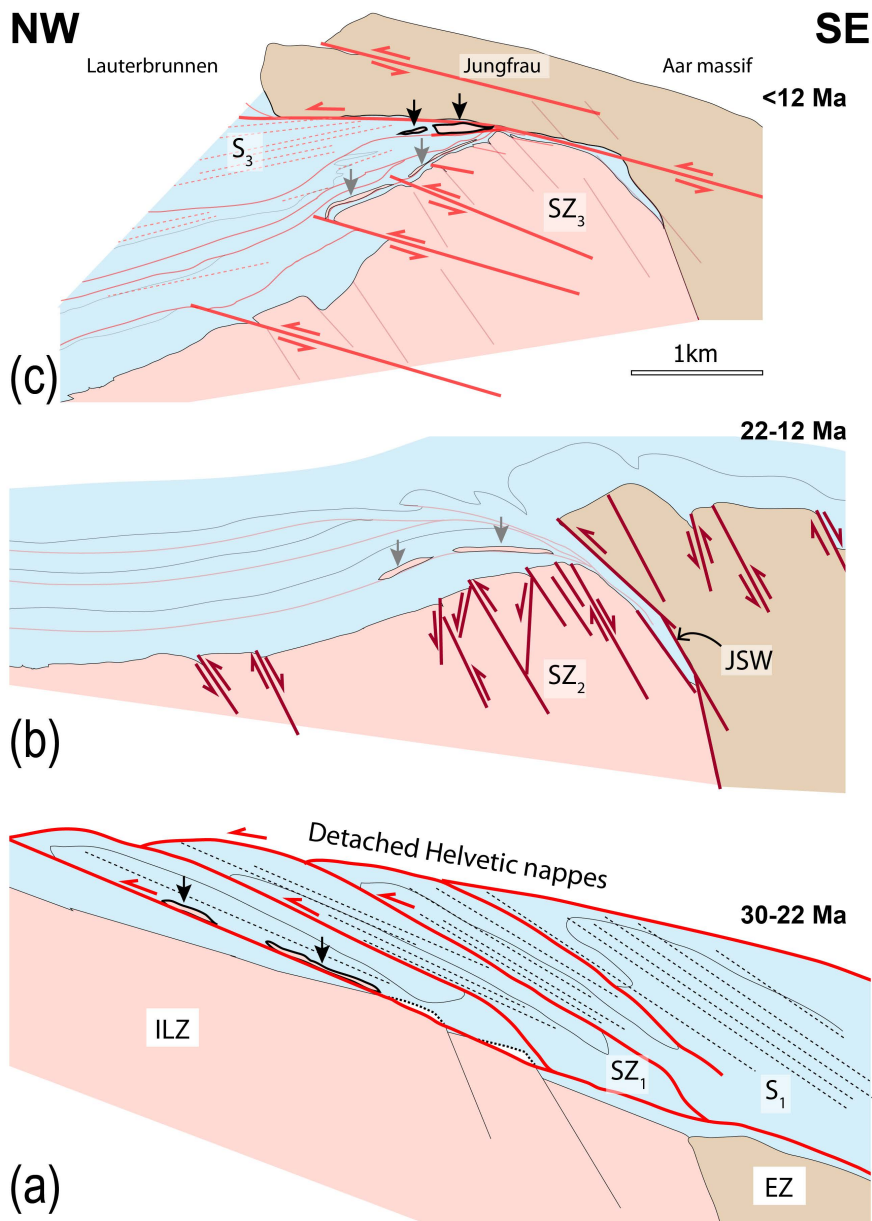

565

Figure 12.1. Schematic sketch of the evolution during the main deformation stages of the Alpine evolution. (a) In sequence imbricate stacking during the late Kiental phase that induced S<sub>1</sub> foliation and led to the incorporation of basement slabs into the sediment stack (black arrows). (b) Steep reverse faulting of SZ<sub>2</sub> that induced folding in the cover during the Handegg phase. (c) SZ<sub>3</sub> thrusts and S<sub>3</sub> foliation in the sediments-sedimentary cover during the Pfaffenloch phase along with second generation of basement slabs incorporated into the sediments-sedimentary cover (black arrows).

| Age                       | Main phase  | Sub-stage   | Domain           | Main characteristics               | References                                                                        |
|---------------------------|-------------|-------------|------------------|------------------------------------|-----------------------------------------------------------------------------------|
| <a href="#">[Mma]</a>     |             |             |                  |                                    |                                                                                   |
| 30-22                     | Kiental     |             | West Helvetic    | Nappe stacking with folding        | Burkhard (1988)                                                                   |
| 20-?                      | Grindelwald |             | Central Helvetic | Passive rotation and folding       | Burkhard (1988), Pfiffner (2014)                                                  |
| 22-> <a href="#">1220</a> |             | Handegg     | Aar Massif       | Steep normal/reverse faults        | Wehrens et al. (2016) <sub>2</sub> ,<br><a href="#">Berger et al. (2017a)</a>     |
| 20-17                     |             | Oberaar     | South Aar Massif | Dextral/oblique strike slip faults | Wehrens et al. (2016)                                                             |
| <12                       |             | Pfaffenchof | NW Aar Massif    | Flat reverse/normal faults         | Wehrens et al. (2017)                                                             |
| < 5?                      |             | Gadmen      | NW Aar Massif    | Steep brittle reverse faults       | Berger et al. (2017 <sub>ab</sub> )<br><a href="#">Herwegh et al. (in review)</a> |

570 **Table 1. Compilation of deformation phases from literature.**



| Simplified layer          | Fm. Name                         | Age                     | Lithology                                                                                                                          | References                                                                        | Thickness constraint |
|---------------------------|----------------------------------|-------------------------|------------------------------------------------------------------------------------------------------------------------------------|-----------------------------------------------------------------------------------|----------------------|
| <b>Tertiary</b>           | Stad Fm.                         | Priabonian              | Shales intercalated with sandy layers/lenses                                                                                       | Herb (1983), Menkveld-Gfeller et al. (2016)                                       | n/a                  |
|                           | Niederhorn Fm.                   | Bartonian – Priabonian  | Shallow marine limestones, intercalated with sandstones                                                                            | Herb (1983), Menkveld-Gfeller et al. (2016)                                       | <a href="#">n/a</a>  |
| <b>“Siderolithic”</b>     | “Siderolithic”                   | Lutetian – Bartonian    | Erosional infill in karst pockets (sandstones, iron rich carbonates) <a href="#">&amp;and</a> calcareous breccia                   | Menkveld-Gfeller et al. (2016)                                                    | <10m to 40m          |
| <b>Lower Cretaceous B</b> | Betlis Fm./ Helv. Kieselkalk (?) | Valanginian             | Brown weathering biogene spary limestone with chert layers and sandy layers in the top                                             | Strasser (1982), this study                                                       | 50 to 90 m           |
| <b>Lower Cretaceous A</b> | <a href="#">Oe</a> hrli Fm.      | Berriasian              | Light grey, oolitic – biogene limestones                                                                                           |                                                                                   | ? to 150 m           |
| <b>Upper Jurassic B</b>   | Quinten Fm.                      | Oxfordian - Berriasian  | Dark, micritic limestones; on top reef platform limestones                                                                         | Collet <a href="#">&amp;and</a> Parejas (1931), Masson et al. (1980)              | 150 to 250 m         |
| <b>Upper Jurassic A</b>   | Schilt Fm.                       | Calloviaian – Oxfordian | Intercalated limestones with thin marly layers                                                                                     |                                                                                   | 10 to 50 m           |
| <b>Mid Jurassic</b>       | Reischibben Fm.                  | Aalenian – Bathonien    | Echinoderm bearing calcareous breccia and <a href="#">f</a> iron bearing sandstones                                                | Bruderer (1924)                                                                   | <1 to 10 m           |
|                           | Bommerstein Fm.                  | Toarcian – Aalenian     | Shales with intercalated iron rich sandstones and echinoderm bearing calcareous breccia                                            | Bruderer (1924)                                                                   | <1 to 30 m           |
| <b>Triassic</b>           | Quarten Fm.                      | Late Triassic           |                                                                                                                                    | Bruderer (1924), this study                                                       | <a href="#">n/a</a>  |
|                           | <a href="#">Roe</a> sti Fm.      | Anisian                 | Dolomites: pseudomorphs after gypsum, oolitic grainstones and mudstones; well-bedded                                               | Gisler et al. (2007), Collet <a href="#">&amp;and</a> Parejas (1931), Rohr (1926) | 5 to 25 m            |
|                           | Mels Fm.                         | Olenekian – Anisian     | Intercalated <a href="#">S</a> sandstones, clays and dolomites (partly <a href="#">anhydrous</a> -gypsum <a href="#">bearing</a> ) | Gisler et al. (2007), Rohr (1926), this study                                     | < 10m                |
| <b>n/a</b>                | n/a                              | Permian?                | Regolith (weathered Permian basement rock)                                                                                         | this study                                                                        | < 5m                 |

**Table 2. Key stratigraphic horizons with most important features and references ([for a detailed discussion see Appendix A](#)).**

| Sample          | x      | y      | Elev. [m] | stratigraphic unit | tectonic unit | RSCM-T [°C] | 2 $\sigma$ |
|-----------------|--------|--------|-----------|--------------------|---------------|-------------|------------|
| <b>MJ-01</b>    | 643469 | 156074 | 3649      | Mid Jurassic       | JSW           | 308         | ± 14       |
| <b>MJ-06</b>    | 643232 | 156012 | 3744      | Upper Jurassic A   | JSW           | 317         | ± 11       |
| <b>EN-01</b>    | 641749 | 158733 | 2388      | Lower Cretaceous A | PA            | 283         | ± 12       |
| <b>Lau-02</b>   | 636387 | 157680 | 838       | Upper Jurassic B   | AUT           | 283         | ± 11       |
| <b>EG-17-01</b> | 643440 | 158638 | 3970      | Upper Jurassic B   | DN            | 292         | ± 10       |
| <b>JT-15E</b>   | 643351 | 157295 | 3216      | Upper Jurassic B   | PA            | 287         | ± 14       |
| <b>AM-01</b>    | 643859 | 157971 | 3127      | Upper Jurassic B   | PA            | 307         | ± 19       |
| <b>GH-01</b>    | 641095 | 156976 | 2798      | Upper Jurassic B   | DN            | 289         | ± 27       |

|575 Table 3. RSCM results for peak metamorphic temperature estimation ... Jungfrau shear zone, PA ... “Para-Autochthonous” sediments, DN... Doldenhorn nappe, AUT ... Autochthonous sediments. Coordinates are given in Swiss coordinate system, (CH1903).

## Appendix A: Geological map compilation and Mesozoic litho-stratigraphy.

580 The structural map (Figs. 1 ~~&and~~ 10) was compiled from the following preexisting maps: Collet and Paréjas (1928),  
Günzler-Seifert ~~&and~~ Wyss (1938) and the GeoCover maps: LK 1228, 1229, 1248, 1249 which in turn largely base on the  
former publications. The most recent maps of Pfiffner et al. (2011) and Berger et al. (2017b), which present the geological  
architecture at a regional scale, were considered as well. A set of profiles produced by Collet ~~&and~~ Paréjas (1931) and  
Günzler-Seifert ~~&and~~ Wyss (1938), Herb (1983) and Hänni ~~&and~~ Pfiffner (2001) was used as a basis. However, the first  
585 sections by Collet ~~&and~~ Paréjas (1931) and Günzler-Seifert ~~&and~~ Wyss (1938) have not been geo-referenced, with the  
consequence that the course of the section cannot be precisely allocated. Therefore, these profiles had first to be  
homogenized in structural style, geo-referenced and integrated in our updated geological map.

The paleo-geographical northwestern [late Permian to early Triassic](#) strata (Fig. 4) has been assigned to a terrestrial flood  
plain environment where the sediments were directly deposited on the weathered crystalline basement (Mels Fm.). This unit  
590 is then overlain by mixed siliciclastic-carbonaceous ~~sediments~~ [sediments](#) and a sequence of dolomites, thus marking a tidal  
flat, Sabkha-type of environment (Röeti Fm.; Gisler et al., 2007). These ~~early-Lower~~ [Triassic](#) ~~sediments~~ [sedimentary rocks](#)  
are preserved as quartzite, slate and dolomite (locally anhydrite bearing in the Röeti and Mels Fm.). In the lowest tectonic  
level (= the cover of the most external part of exhumed the Aar situated in the Lauterbrunnen valley) an up to 30m thick  
suite of dolomites overlain with a suite of shales with up to 5 m thick dolomite beds, which have been assigned to the Röeti  
595 and Quarten Fm., is preserved (Bruderer 1924). These ~~sediments~~ [sedimentary rocks](#) (and possibly overlying units) were  
subject to erosion during the ~~Upper-Late~~ [Triassic/Lower-Early](#) [Jurassic](#). This is recorded by < 1-m thick breccias  
("Basalbreccie") containing Röeti dolomite components (Krebs 1925; Frey 1968). After the hiatus, a thin succession of  
ferrous sandstones intercalated with echinoderm-rich limestones was deposited. This unit, which have been assigned to the  
Bommerstein Fm. and Reischiben ~~Fm. and Fm.~~ are <10 m thick at the base of the Lauterbrunnen valley (Masson et al., 1980;  
600 Collet ~~and~~ [Paréjas](#), 1931) also contain a thin oolitic horizon that contains iron- and manganese-rich concretions. This  
formation is overlain by a suite of cm- to dm-thick bedded, sandy to argillaceous limestones (Schilt Fm.).

These are gradually replaced a the dark, micritic limestone upsection, referred to as the Quinten Fm. Deposition of this latter  
unit commenced in the lower Oxfordian and reaching an estimated thickness between 75m ~~to~~ [and](#) 150m in the study area  
(Collet ~~&and~~ [Paréjas](#), 1931). The Quinten unit itself is overlain by fossil-rich limestones (Oehrlifm.) of varying  
605 thicknesses. These differences in preserved thicknesses are due to a Tertiary phase of erosion where stratigraphic columns  
were dissected to successively deeper levels from the NW to the SW. Iron-rich sandy to argillaceous infills in karst pockets  
combined with a few meters' thin horizon of iron rich sandstones are documents of this erosional phase. Related fragments,  
most likely of pre-Priabonian to Eocene age, are referred to as the "Siderolithikum" (Herb 1983; Wieland 1979). Locally it  
forms up to a 40 m-thick suite of breccias with components of Quinten-limestone, Oehrlifm. and "Helvetischer  
610 Kieselkalk" (Wieland 1979). The overlying calcareous breccia, known as "Mürren-Brekzie" with thicknesses of up to 80 m  
in the Eiger north face (Günzler-Seifert ~~&and~~ [Wyss](#), 1938; Collet ~~&and~~ [Paréjas](#), 1931), already chronicles the Priabonian

transgression resulting in the deposition of the Niederhorn Fm. This unit is considered as equivalent of the Hohgant Sandstone Member (Menkveld-Gfeller et al., 2016). These clastic shoreface deposits are overlain by a limestone suite referred to as the “Lithothamnienkalke” (Menkveld-Gfeller, 1994). Sandstone lenses and dark bituminous carbonates (most likely Gemmenalp limestone equivalents) become more frequently upsection and grade into a succession of marls alternated with siliciclastic turbidites and calciturbidites. These ~~sediments-rocks~~ were mapped as “Flysch” (Collet & Paréjas, 1931), but we note here they have striking similarities with ~~sediments-sedimentary rocks~~ in the flank of the Schwarzmöench, the depositional ages of which have tentatively been assigned to the Priabonian (Günzler-Seifert & Wyss, 1938). Hence it is debatable whether the attribution to the Stad Fm. or to the North Helvetic flysch group is correct.

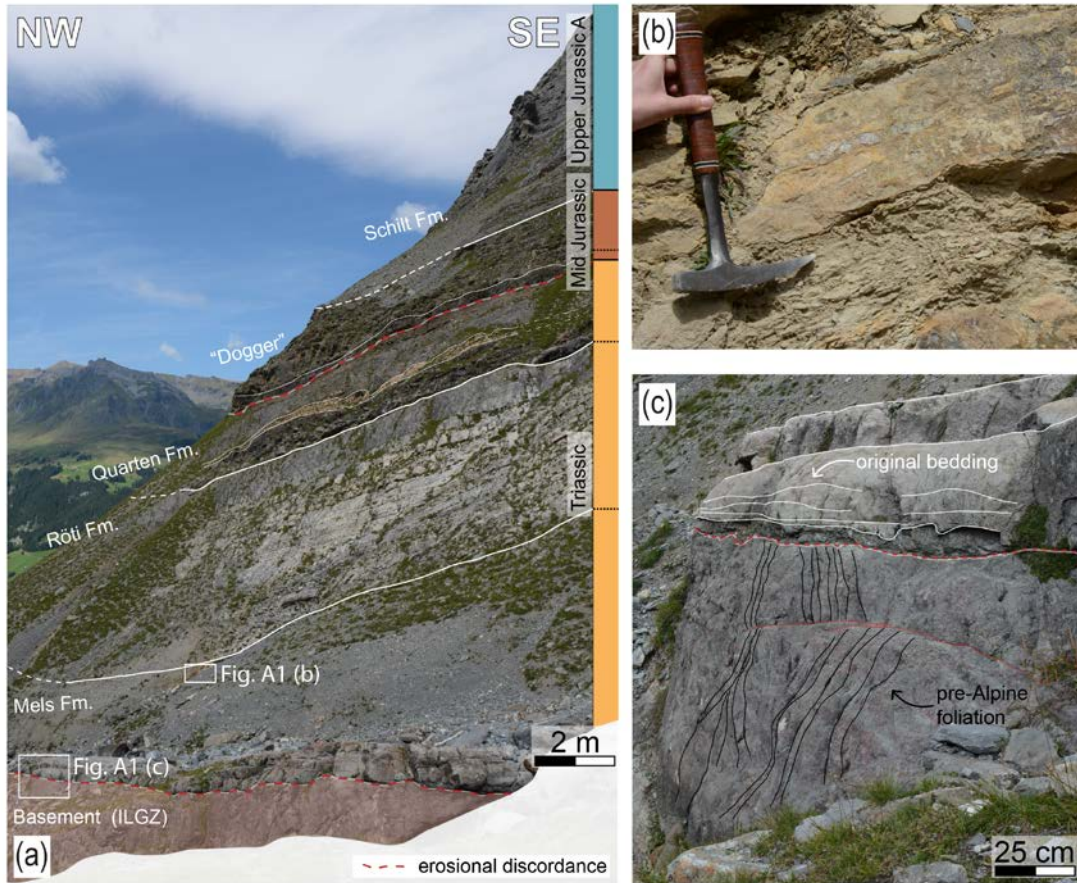

620

**Figure A1.** Undeformed basal stratigraphic section of the ~~sedimentary cover sediments~~ of the ILZ in the Rottal (RT).

Within the Jungfrau sediment wedge (JSW), the sedimentary succession (Fig. 4) starts with a < 1 m-thick Permian paleosol, which has also been encountered farther to the west (Krayenbuhl & Steck, 2009). This is overlain by Triassic slates and sandstones attributed to the Mels ~~Formation~~, and a < 2 m-thick sequence of dolomites (Röti Fm.). Similar to the situation of the Autochthon, no ~~Upper Triassic sediments-rocks~~ are present, either due to non-sedimentation or to a phase of

625

post-depositional erosion lasting until the Middle Jurassic (Masson et al., 1980). The succession of echinoderm-rich and iron-manganese-nodules, deposited during middle-Jurassic times (Bommerstein Fm. and Reischibben Fm.), are considerably thicker than in the NW. This supports the inferred strong tectonic thinning of this unit (~10 m at M~~oe~~nchsjoch, MJ; ~5 m at the Eismeer ET; Collet & Paréjas 1931). Similarly, the overlying sandy limestones of the Schilt Fm. are still thicker than 30 m (Fig. 3). The Upper Jurassic to Cretaceous limestones of the Quinten and Oe~~o~~hrli Formations are generally missing within the JSW and have been displaced to the NW. As a consequence, they can be found in the middle part of the Eiger (Fig. 2), above the Eismeer/Tunnel (ET) area and in the northern flank of the M~~oe~~nch (Fig. 2). The entire sedimentary stack is strongly folded, foliated and thrust, which leads to a doubling and to an inversion of the upper part, while the succession has been repeatedly stacked in other localities.

635

| Sample | x      | y      | Elev. | rock type                                         | Domain              | Qtz<br>rec. | mica<br>dominance | Mica in<br>SZ | Def. structures             | SZ<br>generation |
|--------|--------|--------|-------|---------------------------------------------------|---------------------|-------------|-------------------|---------------|-----------------------------|------------------|
| JT-23  | 642048 | 155392 | 3388  | <a href="#">gneisgneiss</a><br>(polymetamorph)    | ILZ (tunnel)        | n/a         | WM>Chl>Bt         | n/a           | n/a                         | n/a              |
| JT-27  | 641960 | 155313 | 3417  | <a href="#">gneisgneiss</a><br>(polymetamorph)    | ILZ (tunnel)        | n/a         | WM, Bt            | n/a           | n/a                         | n/a              |
| MJ-04  | 643499 | 156091 | 3647  | <a href="#">gneisgneiss</a><br>mylonite           | ILZ                 | BLG         | Chl               | WM            | mica shear bands            | SZ3              |
| MJ-05  | 643232 | 156012 | 3744  | <a href="#">gneisgneiss</a><br>mylonite           | JSW                 | BLG         | Chl               | Chl           | mica shear bands            | SZ3              |
| SX-01  | 641944 | 155292 | 3565  | <a href="#">gneisgneiss</a><br>mylonite           | EZ                  | BLG         | WM, Chl           | WM            | mica shear bands            | SZ2              |
| SX-02  | 641944 | 155292 | 3565  | <a href="#">gneisgneiss</a><br>(polymetamorph)    | EZ                  | BLG         | WM                | n/a           | n/a                         | n/a              |
| GH-01  | 641095 | 156976 | 2798  | Calcite/sandstone<br>mylonite                     | Tertiary            | n/a         | WM                | WM            | Cc regrowth;<br>SC, fabrics | S1, S3           |
| JT-16E | 643351 | 157295 | 3215  | Calcite mylonite                                  | Upper<br>Jurassic A | n/a         | n/a               | n/a           | Cc regrowth                 | S1, S3           |
| MJ-01  | 643469 | 157295 | 3215  | Echinodermata-<br><a href="#">bearing breccia</a> | Mid<br>Jurassic     | n/a         | n/a               | n/a           | SC fabrics                  | S1, S2, S3       |

**Table A1. Basic data for selected samples used in Figs. 3 & 8. Thin section description for dominant dynamic quartz recrystallization mechanism (BLG... bulging), dominant mica and mica growth in shear zone (if applicable). For shear zone generation discussion see Sect. 4.2.1.**

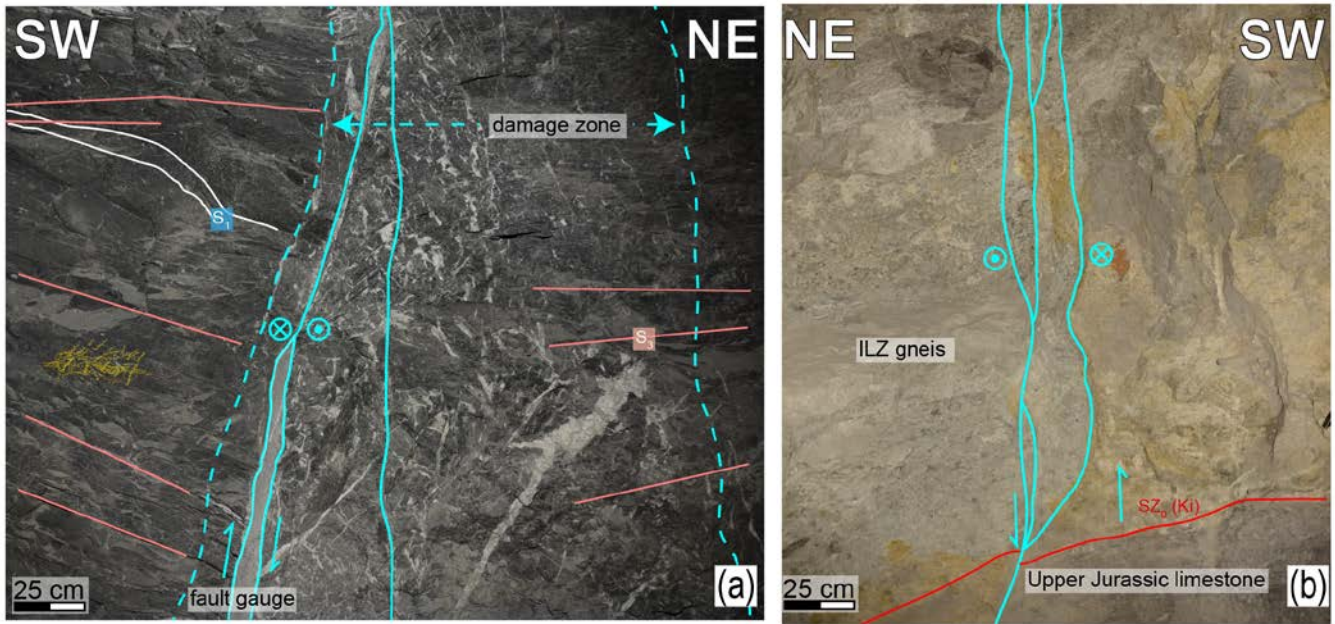

640

Figure A2. Youngest **fault** structures (**F2**) cross-cutting all previous structures in the ~~sediments~~ sedimentary cover (a) and the basement (b) with an oblique to strike-slip behavior.

## Appendix B: RSCM temperature estimate histograms

Fitted Raman spectra distributions (Fig. B1) display reasonable gaussian probability distributions with max. spread of 50°C  
645 (except for GH-01).

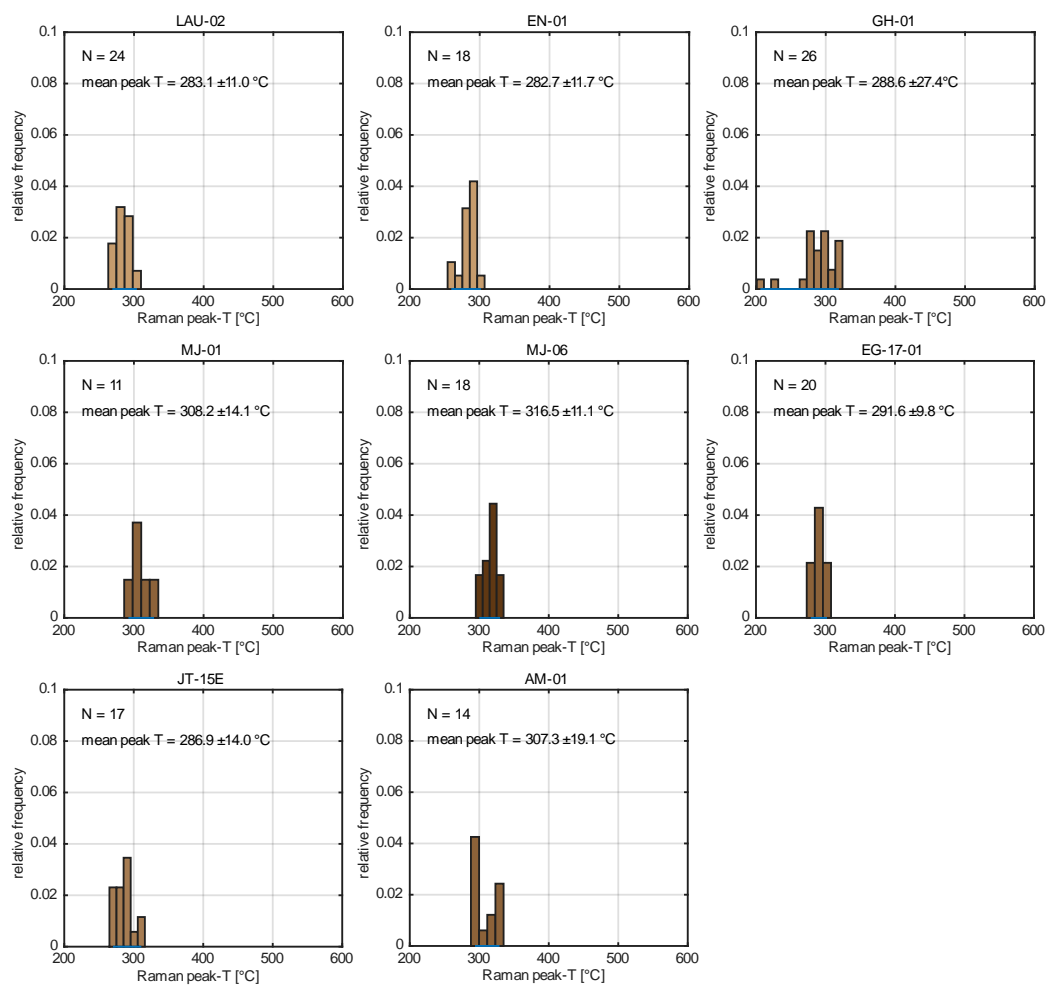

Figure B1. RSCM temperature estimate histograms for each sample for the fitted spectra.

## References

- 650 Abrecht, J.: Geologic units of the Aar massif and their pre-Alpine rock associations: a critical review, Schweizerische Mineral. und Petrogr. Mitteilungen, 74, 5–27, doi:10.5169/seals-56328, 1994.
- [Baltzer, A.: Der mechanische Contact von Gneiss und Kalk im Berner-Oberland, Dalp, Bern, 255 pp, 1880.](#)
- Bambauer, H. U., Herwegh, M. and Kroll, H.: Quartz as indicator mineral in the Central Swiss Alps: the quartz recrystallization isograd in the rock series of the northern Aar massif, Swiss J. Geosci., 102, 345–351, doi:10.1007/s00015-009-1319-z, 2009.
- 655 Baumberger, R., Herwegh, M., Kissling, E. Remote sensing and field data based structural 3D modelling (Haslital, Switzerland) in combination with uncertainty estimation and verification by underground data. AGU Geophysical Monographs, in press.
- Berger, A., Wehrens, P., Lanari, P., Zwingmann, H. and Herwegh, M.: Microstructures, mineral chemistry and geochronology of white micas along a retrograde evolution: An example from the Aar massif (Central Alps, Switzerland), Tectonophysics, 721, 179–195, doi:10.1016/j.tecto.2017.09.019, 2017a.
- [Berger, A., Mercolli, I., Herwegh, M., and Gnos E.: Geological Map of the Aar Massif, Tavetsch and Gotthard Nappes 1:100 000. ISBN 978-3-302-40093-8, 2017b.](#)
- 665 Beyssac, O., Goffé, B., Chopin, C. and Rouzaud, J. N.: Raman spectra of carbonaceous material in metasediments: a new geothermometer, J. Metamorph. Geol., 20, 859–871, doi:10.1046/j.1525-1314.2002.00408.x, 2002.
- Bruderer, W.: Les sédiments du bord septentrional du Massif de l'Aar du Trias à l'Argovien: Thèse Sc. Lausanne 86p, 1924.
- Burkhard, M.: L'Helvétique de la bordure occidentale du massif de l'Aar (évolution tectonique et métamorphique), Eclogae Geol. Helv., 81, 63–114, doi:10.5169/seals-166171, 1988.
- [Burkhard, M.: Calcite twins, their geometry, appearance and significance as stress-strain markers and indicators of tectonic regime: a review, J. Struct. Geol., 15\(3–5\), 351–368, doi:10.1016/0191-8141\(93\)90132-T, 1993.](#)
- [Burkhard, M.: Ductile deformation mechanisms in micritic limestones naturally deformed at low temperatures \(150–350°C\), Geol. Soc. London, Spec. Publ., 54, 241–257, doi:10.1144/GSL.SP.1990.054.01.23, 1990.](#)
- Challandes, N., Marquer, D. and Villa, I. M.: P-T-t modelling, fluid circulation, and <sup>39</sup>Ar-<sup>40</sup>Ar and Rb-Sr mica ages in the Aar Massif shear zones (Swiss Alps), Swiss J. Geosci., 101, 269–288, doi:10.1007/s00015-008-1260-6, 2008.
- 675 Collet, L. and Paréjas, E.: Géologie de la chaîne de la Jungfrau, Beiträge zur Geol. Karte der Schweiz, n.s. 63, 1931.
- [Escher von der Linth, A.: Erläuterung der Ansichten einiger Contact-Verhältnisse zwischen Krystallinischen Feldspathgesteinen und Kalk im Berner Oberland, 13p, doi:10.3931/e-rara-19223, 1839.](#)
- Fernández, O.: Obtaining a best fitting plane through 3D georeferenced data, J. Struct. Geol., 27, 855–858, doi:10.1016/j.jsg.2004.12.004, 2005.
- 680 Frey, M. and Mählmann, F.: Alpine metamorphism of the Eastern. Schweizerische Mineral. und Petrogr. Mitteilungen, 79, 135–154, doi:http://doi.org/10.5169/seals-60202, 1999.



- Gisler, C., Hochuli, P. A., Ramseyer, K., Bläsi, H. and Schlunegger, F.: Sedimentological and palynological constraints on the basal Triassic sequence in Central Switzerland, *Swiss J. Geosci.*, 100, 263–272, doi:10.1007/s00015-007-1225-1, 2007.
- 685 [Glotzbach, C., Reinecker, J., Danišik, M., Rahn, M., Frisch, W. and Spiegel, C.: Thermal history of the central Gotthard and Aar massifs, \*European Alps: Evidence for steady state, long-term exhumation, J. Geophys. Res.\*, 115\(F3\), F03017, doi:10.1029/2009JF001304, 2010.](#)
- Günzler-Seifert, H. and Wyss, R.: Erläuterungen zum Kartenblatt Grindelwald, Geol. Kommission der schweiz. Naturforsch. Gesellschaft, 1938.
- 690 Haertel, M. and Herwegh, M.: Microfabric memory of vein quartz for strain localization in detachment faults: A case study on the Simplon fault zone, *J. Struct. Geol.*, 68, 16–32, doi:10.1016/j.jsg.2014.08.001, 2014.
- [Handy, M. R., M. Schmid, S., Bousquet, R., Kissling, E. and Bernoulli, D.: Reconciling plate-tectonic reconstructions of Alpine Tethys with the geological–geophysical record of spreading and subduction in the Alps, \*Earth-Science Rev.\*, 102\(3–4\), 121–158, doi:10.1016/j.earscirev.2010.06.002, 2010.](#)
- 695 Herb, R.: Bericht über die Exkursion der Schweizerischen Geologischen Gesellschaft auf das Schilthorn vom 19. September 1982, *Eclogae Geol. Helv.*, 76, 181–188, doi:10.5169/seals-165356, 1983.
- Herwegh, M. and Pfiffner, O. A.: Tectono-metamorphic evolution of a nappe stack: A case study of the Swiss Alps, *Tectonophysics*, 404, 55–76, doi:10.1016/j.tecto.2005.05.002, 2005.
- Herwegh, M., de Bresser, J. H. P. and ter Heege, J. H.: Combining natural microstructures with composite flow laws: an improved approach for the extrapolation of lab data to nature, *J. Struct. Geol.*, 27, 503–521, doi:10.1016/j.jsg.2004.10.010, 2005.
- 700 Herwegh, M., Berger, A., Baumberger, R., Wehrens, P. and Kissling, E.: Large-Scale Crustal-Block-Extrusion During Late Alpine Collision, *Sci. Rep.*, 7, 413, doi:10.1038/s41598-017-00440-0, 2017.
- Kammer, A.: Alpidische Verformung des aarmassivischen Nordrandes, *Schweizerische Mineral. und Petrogr. Mitteilungen*, 69, 37–53, doi:10.5169/seals-52775, 1989.
- 705 [Kennedy, L. A. and White, J. C.: Low-temperature recrystallization in calcite: Mechanisms and consequences, \*Geology\*, 29\(11\), 1027, doi:10.1130/0091-7613\(2001\)029<1027:LTRICM>2.0.CO;2, 2001.](#)
- Kissling, E. and Schlunegger, F.: Rollback Orogeny Model for the Evolution of the Swiss Alps, *Tectonics*, 37, 1097–1115, doi:10.1002/2017TC004762, 2018.
- 710 Krayenbuhl, T. and Steck, A.: Structure and kinematics of the Jungfrau syncline, Faflertal (Valais, Alps), and its regional significance, *Swiss J. Geosci.*, 102, 441–456, doi:10.1007/s00015-009-1333-1, 2009.
- Labhart, T. P.: Mehrphasige alpine Tektonik am Nordrand des Aarmassivs Beobachtungen im Druckstollen Trift-Speicherberg (Gadmental) der Kraftwerke Oberhaslo AG, *Eclogae Geol. Helv.*, 59, 803–830, doi:doi.org/10.5169/seals-163395, 1966.

- 715 Labhart, T. (1977): Aarmassiv und Gotthardmassiv. - Sammlung geolog. Führer Nr. 63, Gebr. Bornträger, Berlin, Stuttgart, 1977.
- Lünsdorf, N. K. and Lünsdorf, J. O.: Evaluating Raman spectra of carbonaceous matter by automated, iterative curve-fitting, *Int. J. Coal Geol.*, 160–161, 51–62, doi:10.1016/j.coal.2016.04.008, 2016.
- Lünsdorf, N. K., Dunkl, I., Schmidt, B. C., Rantitsch, G. and von Eynatten, H.: Towards a Higher Comparability of  
720 Geothermometric Data obtained by Raman Spectroscopy of Carbonaceous Material. Part I: Evaluation of Biasing Factors, *Geostand. Geoanalytical Res.*, 38, 73–94, doi:10.1111/j.1751-908X.2013.00249.x, 2014.
- Lünsdorf, N. K., Dunkl, I., Schmidt, B. C., Rantitsch, G. and von Eynatten, H.: Towards a Higher Comparability of Geothermometric Data Obtained by Raman Spectroscopy of Carbonaceous Material. Part 2: A Revised Geothermometer, *Geostand. Geoanalytical Res.*, 41, 593–612, doi:10.1111/ggr.12178, 2017.
- 725 Masson, H., Herb, R., Steck, A.: Helvetic Alps of Western Switzerland, Excursion no. 1. in: Trümpy, R. *Geology of Switzerland - a guide book, Part B, Geological Excursions*, 109-153. Wepf & Co, 1980.
- McClay, K. R.: Glossary of thrust tectonics terms. In K. R. McClay (Ed.), *Thrust tectonics* (pp. 419–433), London: Chapman and Hall, 1982.
- Menkveld, J.W.: *Der geologische Bau des Helvetikums der Innerschweiz*. Diss. Univ. Bern., 1995.
- 730 Menkveld-Gfeller, U., Kempf, O. and Funk, H.: Lithostratigraphic units of the Helvetic Palaeogene: review, new definition, new classification, *Swiss J. Geosci.*, 109, 171–199, doi:10.1007/s00015-016-0217-4, 2016.
- [Milnes, A. G. and Pfiffner, O. A.: Structural development of the infrahelvetic complex, eastern Switzerland, \*Eclogae Geol. Helv.\*, 70\(1\), 83–95, doi:10.5169/seals-164615, 1977.](#)
- Niggli, E. and Niggli, C.: Karten der Verbreitung einiger Mineralien der alpidischen Metamorphose in den Schweizer Alpen  
735 (Stilpnomelan, Disthen, Sillimanit), *Eclogae Geol. Helv.*, 58, 335–368, doi:10.5169/seals-163268, 1965.
- Oberhänsli, R., Schenker, F. and Mercolli, I.: Indications of Variscan nappe tectonics in the Aar Massif, *Schweizerische Mineral. und Petrogr. Mitteilungen*, 68, 509–520, doi:10.5169/seals-52086, 1988.
- Pfiffner, O. A.: The structure of the Helvetic nappes and its relation to the mechanical stratigraphy, *J. Struct. Geol.*, 15, 511–521, doi:10.1016/0191-8141(93)90145-Z, 1993.
- 740 Pfiffner, O.A., Burkhard, M., Hänni, R., Kammer, A., Kliggflied, A., Mancktelow, N.S, Menkveld, J.W., Ramsay, J.G., Schmid, S.M. and Zurbriegen, R. *Structural Map of the Helvetic Zone of the Swiss Alps, including Vorarlberg (Austria) and Haute Savoie (France)*, 1:100000. Special Geological Maps, Federal Office of Topography swisstopo, 2011.
- Pfiffner, O. A.: *Geology of the Alps*, 2nd ed., Wiley Blackwell., 2014.
- 745 Pollack, H. N. and Chapman, D. S.: On the regional variation of heat flow, geotherms, and lithospheric thickness, *Tectonophysics*, 38, 279–296, doi:10.1016/0040-1951(77)90215-3, 1977.

- Rahiman, T. I. H. and Pettinga, J. R.: Analysis of lineaments and their relationship to Neogene fracturing, SE Viti Levu, Fiji, *Geol. Soc. Am. Bull.*, 120, 1544–1555, doi:10.1130/B26264.1, 2008.
- 750 Rolland, Y., Cox, S. F. and Corsini, M.: Constraining deformation stages in brittle–ductile shear zones from combined field mapping and  $^{40}\text{Ar}/^{39}\text{Ar}$  dating: The structural evolution of the Grimsel Pass area (Aar Massif, Swiss Alps), *J. Struct. Geol.*, 31, 1377–1394, doi:10.1016/j.jsg.2009.08.003, 2009.
- Rutishauser, H.: Die quantitative Erfassung von Migmatiten im Aufschlussbereich (Erläutert am Beispiel des Lauterbrunner Kristallins), *Schweizerische Mineral. und Petrogr. Mitteilungen*, 53, 99–124, doi:10.5169/seals-41375, 1973.
- 755 Rutishauser, H.: Flüssige Phasen im migmatitischen Lauterbrunner-Kristallin (Aarmassiv, Alpen), *Geol. Rundschau*, 86, 560–571, doi:10.1007/BF01820831, 1974.
- Sala, P., Pfiffner, O. A. and Frehner, M.: The Alpstein in three dimensions: fold-and-thrust belt visualization in the Helvetic zone, eastern Switzerland, *Swiss J. Geosci.*, 107, 177–195, doi:10.1007/s00015-014-0168-6, 2014.
- Schaltegger, U.: The evolution of the polymetamorphic basement in the Central Alps unravelled by precise U-Pb zircon dating, *Contrib. to Mineral. Petrol.*, 113, 466–478, doi:10.1007/BF00698316, 1993.
- 760 Schaltegger, U., Albrecht, J. and Corfu, F.: The Ordovician orogeny in the Alpine basement: constraints from geochronology and geochemistry in the Aar Massif (Central Alps), *Schweizerische Mineral. und Petrogr. Mitteilungen*, 83, 183–195, doi:10.5169/seals-63144, 2003.
- Schlunegger, F. and Kissling, E.: Slab rollback orogeny in the Alps and evolution of the Swiss Molasse basin, *Nat. Commun.*, 6, 1–10, doi:10.1038/ncomms9605, 2015.
- 765 [Schlunegger, F. and Willett, S.: Spatial and temporal variations in exhumation of the central Swiss Alps and implications for exhumation mechanisms. \*Geol. Soc. London, Spec. Publ.\*, 154\(1\), 157–179, doi:10.1144/GSL.SP.1999.154.01.07, 1999.](#)
- Schmid, S. M., Fügenschuh, B., Kissling, E. and Schuster, R.: Tectonic map and overall architecture of the Alpine orogen, *Eclogae Geol. Helv.*, 97, 93–117, doi:10.1007/s00015-004-1113-x, 2004.
- 770 [Schmid, S. M., Pfiffner, O. A., Froitzheim, N., Schönborn, G. and Kissling, E.: Geophysical-geological transect and tectonic evolution of the Swiss-Italian Alps, \*Tectonics\*, 15\(5\), 1036–1064, doi:10.1029/96TC00433, 1996.](#)
- Schneeberger, R., De la Varga, M., Egli, D., Berger, A., Kober, F., Wellmann, F. and Herwegh, M.: Methods and uncertainty-estimations of 3D structural modelling in crystalline rocks: A case study, *Solid Earth Discuss.*, 1–23, doi:10.5194/se-2017-47, 2017.
- 775 Steck, A.: Die alpidischen Strukturen in den Zentralen Aaregranite des westlichen Aarmassivs, *Eclogae Geol. Helv.*, 61, 19–48, doi:10.5169/seals-163584, 1968.
- Steck, A.: Structures de déformations tertiaires dans les Alpes centrales (transversales Aar-Simplon- Ossola), *Eclogae Geol. Helv.*, 77(1), 55–100, doi:doi.org/10.5169/seals-165499, 1984.

- 780 Stipp, M., Stünitz, H., Heilbronner, R. and Schmid, S. M.: Dynamic recrystallization of quartz: correlation between natural and experimental conditions, *Geol. Soc. London, Spec. Publ.*, 200(1), 171–190, doi:10.1144/GSL.SP.2001.200.01.11, 2002.
- Strasser, A.: Fazielle und sedimentologische Entwicklung des Betlis-Kalkes (Valanginian) im Helvetikum der Zentral- und Ostschweiz, *Ecolgae Geol. Helv.*, 75(1), 23, doi:10.5169/seals-165212, 1982.
- 785 Ustaszewski, M., Herwegh, M., McClymont, A. F., Pfiffner, O. A., Pickering, R. and Preusser, F.: Unravelling the evolution of an Alpine to post-glacially active fault in the Swiss Alps, *J. Struct. Geol.*, 29(12), 1943–1959, doi:10.1016/j.jsg.2007.09.006, 2007.
- Wehrens, P., Berger, A., Peters, M., Spillmann, T. and Herwegh, M.: Deformation at the frictional-viscous transition: Evidence for cycles of fluid-assisted embrittlement and ductile deformation in the granitoid crust, *Tectonophysics*, 693, 66–84, doi:10.1016/j.tecto.2016.10.022, 2016.
- 790 Wehrens, P., Baumberger, R., Berger, A. and Herwegh, M.: How is strain localized in a meta-granitoid, mid-crustal basement section? Spatial distribution of deformation in the central Aar massif (Switzerland), *J. Struct. Geol.*, 94, 47–67, doi:10.1016/j.jsg.2016.11.004, 2017.
- [Valla, P. G., Rahn, M., Shuster, D. L. and van der Beek, P. A.: Multi-phase late-Neogene exhumation history of the Aar massif, Swiss central Alps, \*Terra Nov.\*, 28\(6\), 383–393, doi:10.1111/ter.12231, 2016.](#)
- 795 Xu, L., Renner, J., Herwegh, M. and Evans, B.: The effect of dissolved magnesium on creep of calcite II: Transition from diffusion creep to dislocation creep, *Contrib. to Mineral. Petrol.*, 157(3), 339–358, doi:10.1007/s00410-008-0338-5, 2009.
